# Supplementary material for: Evolution of Natural Lifespan Variation and Molecular Strategies of Extended Lifespan
Source: bioRxiv preprint, doi:10.1101/2020.11.09.374488, version 2 (2021-10-29)
Supplement: Supplementary Table 3 [file 374488_file05.xlsx]

## Sheet: PCA-Loading_NormalizedRNAseq
Enterez_ID	Gene	PC1	PC2	PC3
850445	TUP1	0.0288493	-1.45721e-05	-0.00154988
851212	CCR4	0.0284286	-0.00163107	0.00269014
851048	NUP2	0.0283435	0.000742285	0.00318948
854841	DAL81	0.0282872	0.000351519	0.00357047
850893	PWP1	0.0282717	-0.0044797	-0.002314
853811	DEF1	0.0282316	-0.000877788	-0.00913817
850652	DRS1	0.0281105	-0.00253564	-0.00452948
851071	RSC2	0.0280871	0.00313732	-0.000730399
853836	IXR1	0.0280505	0.000512188	-0.00683681
855060	MCM1	0.0280271	-0.00029916	-0.00640313
852042	NPL3	0.0279884	-0.00499983	-0.000430651
853757	GFA1	0.0279833	0.00380006	-0.00308206
855599	NAF1	0.0278123	-0.00394853	-0.00014134
852757	PRP43	0.0278052	-0.00312705	0.00164795
853071	TIF4631	0.0277417	0.00572196	-0.00359296
855664	NOP2	0.0277293	-0.00244368	-2.49226e-05
851665	RLI1	0.0277278	-0.0020786	-0.00525791
851632	MAK21	0.0277121	-0.00757688	-0.000113833
854290	LEO1	0.0276559	-0.00688351	0.00147067
856799	MOT2	0.0276108	-0.00168975	0.00150655
851513	SIT4	0.0275694	-0.00705229	-0.00783892
853780	RRP14	0.0275485	-0.00742836	-0.00740777
852007	UTP5	0.0275285	-0.000518723	0.00112916
855911	NAB3	0.0275068	0.00602133	-0.0012957
853409	NSP1	0.0274776	-0.00289546	-0.00317675
856613	SKN7	0.0274496	-0.00192816	-0.00198723
851119	SFP1	0.0274425	0.00212804	-0.00460302
851905	SUM1	0.0274026	0.00197548	-0.00122712
852779	LSG1	0.0273551	0.00181155	-0.00179777
852513	NGR1	0.027332	0.00437786	-0.00817875
853774	CAB3	0.0272967	0.00323018	0.000706824
855524	WHI3	0.0272714	0.00612518	-0.00432172
853692	PIR1	0.0271946	-0.00396722	-0.00614074
855897	HRR25	0.0271802	-0.00775305	-0.00977407
853347	SAP185	0.0270623	0.00409296	0.00146725
852697	MPT5	0.0270458	0.00457236	-0.00532702
851788	UME6	0.0270266	-0.00151283	0.000335612
855505	RAP1	0.0269933	0.00069068	0.00309032
854663	SSL2	0.0269611	0.00498097	-0.00657064
850612	RET2	0.0269373	-0.000725904	0.000582714
850598	RSC8	0.02688	-0.0107158	0.00232771
854543	PRT1	0.0268797	0.00143574	0.00305178
854790	TIM44	0.0268742	0.00533365	-0.000486553
850455	CDC39	0.02683	0.00986188	0.00130442
852848	MIG1	0.0268127	-0.00480694	-0.00896163
856095	RRP12	0.0268094	0.0043339	-0.00169213
854307	SFL1	0.0268002	0.000913454	-0.00301799
855531	None	0.0267986	-0.00707533	-0.0077043
851399	CMR1	0.0267282	-0.00174998	-0.00203781
854322	RPB2	0.0266999	-0.00602548	0.00763895
850807	MSL5	0.0266985	0.00608233	-0.00763178
850304	SPB1	0.0266978	0.00572329	-0.00342388
856895	UBP3	0.0266813	0.00921033	-0.00799477
853160	SDA1	0.0266321	0.00517956	0.00428374
855787	BRE5	0.0266296	-0.0104189	-0.00606009
852740	SEC27	0.0266248	-0.00198922	0.00489842
854664	CCT2	0.0265893	0.00539362	-0.00409941
855357	NIP1	0.0265739	-0.0109489	-0.00949305
852657	CLG1	0.0265523	-0.00924092	-0.0100639
852802	DBP3	0.026521	0.00294014	-0.00557392
850409	TAF2	0.0265144	0.00120484	0.0085992
856675	ANP1	0.0265074	-0.000569182	-0.00872807
851415	RPO21	0.0264849	0.0113882	0.00159181
856815	UTP7	0.0264814	-0.00775906	0.00131734
854084	NBA1	0.0264683	-0.0106226	-0.00512326
850784	IOC2	0.0264063	0.00748859	0.00256278
851214	FUN30	0.0263826	-0.00893681	-0.00096249
855342	LCB1	0.0263771	-0.00555105	-0.00491323
856016	RLM1	0.0263311	0.00305968	0.000327524
850639	SPA2	0.0263307	-0.00613634	0.00720622
856898	OXA1	0.0263197	-0.000947213	-0.00903342
853714	LTV1	0.026301	-0.0030812	0.000245043
854555	NUD1	0.0262374	0.00175194	0.0066655
852540	None	0.0262359	0.0019309	-0.00930375
855716	PUB1	0.0261973	-0.0126809	-0.00533734
850506	TUB2	0.0261863	-0.00493155	-0.00935709
852861	PIB2	0.0261826	0.000680367	0.00251569
852418	GRS1	0.0261691	-0.00619891	-0.00466863
851747	STB3	0.026158	0.000523225	-0.00269893
853534	LIA1	0.0261544	-0.00541844	-0.00147911
854927	DAT1	0.0261463	0.00163449	-0.00706522
855535	UBP10	0.026141	-0.00795736	0.000420021
853631	EAP1	0.0261264	0.00750213	0.00161692
852782	SRM1	0.0261235	0.00245221	-0.000239033
850775	SMC4	0.0260967	0.000378878	-0.00228307
851107	CCW14	0.0260859	-0.00409669	-0.0108648
853327	ASF1	0.0260782	-0.0106409	0.00137685
852876	PMA1	0.0260461	-0.00320498	-0.0139584
853916	UTH1	0.0259985	0.0030292	-0.0128697
852371	RPG1	0.0259929	-0.000757458	0.0105919
852704	ROK1	0.0259681	-0.00556057	0.00249073
852501	MCM7	0.025957	-0.00101591	0.0105046
850628	GPI13	0.0259377	-0.00537812	-0.00329214
851887	SSD1	0.0258951	0.00259021	0.00445917
855474	None	0.0258945	-0.00467079	0.00722654
855788	POP2	0.0258867	-0.0111956	0.0033983
854379	DED1	0.025847	0.00609422	-0.0146288
855450	BNI1	0.0258451	-0.00411672	0.00253512
855875	NEW1	0.025814	0.00910713	0.00130837
852229	PIN4	0.0257919	0.0052371	-0.0157195
855884	BMS1	0.0257851	0.0114275	-0.000268404
851069	ILV5	0.0257398	-0.010098	-0.00317042
851126	VIP1	0.0257361	0.00833451	0.00281033
850747	SHM2	0.025735	-0.00581662	-0.00112003
853376	UTP18	0.0257274	0.00800265	0.00459621
856084	MET12	0.025719	0.000978333	0.0036366
854127	GAS5	0.0257015	-0.00298542	-0.0114334
855958	KES1	0.0256935	-0.00517352	0.000207288
856916	RPH1	0.0256755	-0.00487038	0.0092898
856819	ILV1	0.025659	-0.00554474	0.00990632
855408	KRI1	0.0256574	-0.00177711	0.00478331
851191	CLN3	0.0256559	0.00508577	-0.00657067
854554	NDD1	0.0256291	-0.00264869	-0.0111253
850347	SGF29	0.0256232	-0.00780872	-0.00522036
855245	PFK2	0.0256203	0.00136278	0.000709995
854020	CTR9	0.0256148	0.000331138	-0.0038947
856422	RPN1	0.0256095	-0.00766633	0.00151787
853315	SPT10	0.025604	0.000971241	0.000199729
851722	MKC7	0.0255941	-0.0026975	0.00469502
852755	NAB2	0.0255936	0.00101677	-0.00340101
853767	YJU2	0.0255888	0.00240917	-0.0128774
852982	UTP22	0.0255355	0.00588035	-0.00259428
855571	RPC31	0.0255128	-0.003197	-0.00585654
854130	MDM38	0.0254996	0.00716838	-0.00824027
851590	NSI1	0.0254292	-0.0104082	4.55425e-05
856356	OCA5	0.02542	0.00499652	0.00990484
855633	NST1	0.0254046	0.00357748	0.00771996
856746	GCD11	0.0253989	-0.0128324	-0.00163714
851109	ATP10	0.0253898	-0.00152531	-0.0101039
856058	DIG1	0.0253881	-0.00888539	0.00419462
855976	HHO1	0.0253348	-2.27748e-05	-0.01517
851403	SAS10	0.0253328	-0.00394011	0.00205435
850585	CDC14	0.0253326	-0.00221589	-0.00935204
852952	ADE6	0.0253323	0.00583087	0.00190535
853281	HSP150	0.0253236	0.00065069	0.0011781
856063	NOP4	0.0253213	0.00124366	0.0049048
851373	SHS1	0.0252999	-0.000801448	-0.011963
854095	GPD2	0.025292	-0.000268197	-0.00870272
851949	PAL1	0.0252615	-0.0121878	0.00148551
854106	GAL11	0.0252471	-0.00719104	-0.00391942
856311	SEC23	0.02518	0.00508501	0.00626714
854141	None	0.0251625	-0.00417429	-0.00778167
856507	CDC12	0.0251596	-0.00785072	-0.00515737
855030	SOK2	0.0251385	0.00356536	0.00280636
852738	FLC3	0.0251228	-0.00869381	-0.00725269
854773	NOT3	0.0251059	0.00570285	-0.0129155
855066	NUP116	0.0251009	-0.00993539	0.0060474
855470	NRD1	0.0250934	0.000506086	0.00464941
852860	PGD1	0.0250623	0.00393124	-0.000853417
856665	GLY1	0.0250236	-0.00349838	0.0051303
851249	GEM1	0.0249983	-0.0040608	0.00743609
856615	BAT1	0.0249822	-0.00557804	-0.00430835
852410	CYC8	0.0249661	0.0122808	0.00278864
851435	UBP1	0.0249642	0.00363255	-0.00738433
854445	FSF1	0.0249426	-0.00439497	-0.00424746
854087	RTG1	0.0249406	0.00121789	-0.0152051
856574	DBP8	0.0249228	-0.000216458	-0.0083827
856737	AFG3	0.0248951	0.00803443	-0.0131411
851024	CDC3	0.0248751	-0.0107116	-0.00463257
855320	FCP1	0.0248688	0.00419769	0.0107922
852870	PUF4	0.0248667	0.0123615	0.00639294
855409	MCK1	0.0248421	-0.000905557	-0.0150863
854971	None	0.0248163	0.00340399	-0.00174383
855221	SSO2	0.0248076	-0.00916289	-0.00906329
854138	DIS3	0.0247947	0.00486492	0.00778092
850631	TPO1	0.0247735	-0.00271305	-0.00837494
855319	DSK2	0.0247428	-0.000122139	-0.00317061
856897	PET122	0.0247232	0.00484954	-0.00867602
852449	SPP381	0.0246904	-0.00111456	-0.0115205
855311	TMA23	0.0246736	-0.0139419	-0.00554949
856532	None	0.0246712	-0.00305508	0.00594905
854976	RAD52	0.024662	0.000256761	-0.0072051
851369	SSB1	0.0246272	0.00142947	-0.00621228
853839	MAE1	0.0246124	0.00145007	0.00337977
856268	ASN1	0.024602	-0.00191534	-0.00298948
851774	NUP42	0.0245999	-0.00278879	-0.00519244
851698	TRM1	0.024594	-0.0118597	0.00130934
851678	ARX1	0.0245677	-0.0071859	-0.00292337
855243	TOM40	0.0245521	0.00756295	-0.00813028
851624	CDC34	0.0245445	-0.0117965	-0.0105132
854889	TUB1	0.0245418	0.00761734	-0.00904024
854764	SYG1	0.0245393	-0.00884226	-0.0033287
851530	DBP10	0.0245167	0.00505996	0.00695797
850920	IFH1	0.0244872	0.00946378	0.00740634
855389	EGT2	0.0244804	0.00107662	-0.00285312
856098	RQC2	0.0244607	-0.00805718	0.0118838
850415	ARE1	0.0244411	-0.00529614	0.00113054
856860	YCK3	0.0244286	0.0113638	-0.00854058
851716	HPR1	0.024424	-0.0111257	-0.00183598
853555	FIP1	0.0244179	-0.00177515	-0.0132593
853197	PXR1	0.0244152	-0.00898739	-0.00329697
852607	RTF1	0.0244021	0.0091207	-0.0100375
850522	FRS2	0.0243589	0.00828867	-0.00417231
856178	ROX1	0.0243101	0.000368238	-0.0055564
855467	RTC4	0.0242934	-0.00572353	-0.00560883
854369	TOA1	0.0242865	-0.0154716	-0.00693233
855541	RHO5	0.0242751	-0.00886962	-0.00970766
854487	NOP58	0.0242739	-0.00167576	-0.0120583
856119	RPA135	0.0242673	0.00234308	0.0119287
851768	CCT6	0.0242461	-0.00331703	0.0101833
851412	CCT4	0.024231	-0.00810184	0.00882465
854520	None	0.0242294	-0.00556614	-0.0157399
853157	YAP1802	0.0242114	0.00935048	0.000261794
853956	RPF2	0.0242037	-0.00576718	-0.0107571
855053	MSN2	0.0242005	0.00214083	0.00689068
853059	CYS4	0.0241859	-0.00284103	-0.00507352
856719	NOP16	0.0241798	-0.00760646	-0.00745037
852241	URA7	0.0241767	-0.00304708	-0.00161145
852018	SIZ1	0.0241618	-0.00115816	-0.00213215
855545	TDA7	0.0241409	-0.00328341	0.0107835
853102	CRH1	0.0241305	-0.00351209	-0.0018886
851115	BDF1	0.0241273	-0.0102502	-0.0112469
855215	MMT1	0.0241025	-0.011988	-0.00826275
851803	RAD9	0.0241009	-0.003441	0.012772
855417	TRF5	0.0241004	-0.0015002	0.00643539
856467	TRM5	0.0240688	-0.00386367	0.0112294
852977	PIL1	0.0240594	-0.0076266	-0.00995697
854981	YOX1	0.0240509	-0.00330719	0.00714535
856020	SEC16	0.0240412	0.0137403	0.00209923
856869	PMD1	0.0240256	0.00775912	0.00497741
850313	MGR1	0.0240053	0.00701279	-0.00135859
851271	BUD14	0.0239841	-0.00186601	0.014422
852432	CKS1	0.0239536	-0.0128409	-0.0104449
851731	ENT5	0.0239383	0.01362	-0.00157258
853930	TRM2	0.0239276	0.00970689	-0.00523234
851246	FLC2	0.0239208	-0.00312777	0.00533506
852582	PAF1	0.0239161	-0.0140821	-0.00915063
852617	ADE5%2C7	0.0239101	-0.010435	0.00735209
851727	NUM1	0.0239018	0.00496036	0.00640178
850534	IES1	0.0238789	0.00495637	-0.0172136
856850	BOI2	0.0238635	0.00201637	0.00372681
855428	CAF40	0.0238523	0.00346859	0.0121332
854162	RRP6	0.0238468	-0.00205656	0.00881565
854684	POG1	0.0238291	-0.00518885	-0.00362527
851394	DHH1	0.0238286	0.00777794	-0.0140585
855769	SOL1	0.0238151	0.0011294	-0.00553253
855583	THO2	0.0237779	0.0044099	0.00261251
856188	TKL1	0.0237544	-0.0079294	0.00867831
856912	PAB1	0.0237331	0.0097622	-0.000806847
856646	CAN1	0.0237272	0.00327257	-0.0148845
850429	HCM1	0.0236978	0.0121231	-0.000807386
851061	KAP95	0.0236797	0.0148026	-0.00723777
852660	VAM7	0.023677	-0.010992	0.00453619
854129	YAP7	0.02366	-0.0131798	-0.00195963
856766	SAH1	0.0236417	-0.00277005	-0.00600443
854675	FKH1	0.0236292	-0.00985467	0.000265393
850389	PMP1	0.0235931	-0.0151162	-0.00766145
850594	PHO4	0.0235876	0.00068175	0.00567887
855975	TBF1	0.0235871	0.00463991	0.00301076
855356	PSE1	0.0235602	0.0112238	0.00353215
850796	MDN1	0.0235395	0.00371688	0.0163097
856911	CHD1	0.023512	0.0145122	0.00746509
855689	BDP1	0.0235052	-0.00656411	0.00978952
856292	TIF3	0.0234777	-0.0113595	0.004014
851470	ASM4	0.0234418	-0.0101645	0.00804855
856831	RAD51	0.0234342	0.00223843	0.00646062
855570	INN1	0.0233998	0.00110024	-0.0106552
850307	APA1	0.0233692	-0.0138484	-0.00595159
851756	NGG1	0.0233648	0.00281783	0.00559482
854500	LDB19	0.0233476	0.0151762	0.00848309
853086	ERG1	0.0233384	-0.0139044	-0.00357148
853540	MIR1	0.023335	0.00162719	-0.0041791
852197	None	0.0233346	0.00902012	0.01321
856789	FCY22	0.0233316	0.00882128	-0.00231016
855104	NAM7	0.0232893	0.00415861	-0.0110463
854116	NOP12	0.0232734	-0.000382292	-0.00094463
856778	HOM3	0.0232718	-0.0043047	0.00765631
854156	TOP1	0.0232609	0.00479576	0.00858629
851313	NOP6	0.023238	-0.0158281	-0.00636581
854391	RUD3	0.0232137	-0.00991437	0.002135
855999	SYH1	0.02321	0.00205329	0.0135048
853445	NOP9	0.0232098	-0.00738378	0.00635993
856453	RSC30	0.0231932	-0.00472662	-0.0113669
851742	SEC1	0.0231709	-0.00968534	0.00404537
853806	MPE1	0.0231475	-0.00490124	0.00402549
853099	HGH1	0.0231031	-0.00768708	-0.000162464
851217	TPD3	0.0231021	-5.98485e-05	-0.01013
852370	ECM33	0.0230992	-0.0135629	-0.0112293
853473	ILV3	0.0230951	-0.00864937	0.00728634
852270	FMT1	0.0230883	0.00431922	-0.0050805
854991	PSP2	0.0230841	0.00717576	-0.00529654
855429	SEC21	0.0230782	-0.00299055	-0.00116164
854657	MLP2	0.023075	-0.0114859	0.00235146
853957	NUP133	0.0230743	0.00169803	0.00592168
851969	ESF1	0.0230641	-0.00138104	-0.00217946
856304	None	0.0230545	0.00626092	-0.0137498
856486	NAM8	0.023017	0.003192	-0.00200843
854912	RSC9	0.0229505	-0.00650952	-0.0187424
853952	MSA2	0.0229488	0.000748053	-0.0048234
853535	NPA3	0.0229487	0.00469155	0.0091784
855028	BUD22	0.0229249	0.00429329	-0.00420095
856711	MIT1	0.0229178	0.0021289	0.00663922
852986	VAS1	0.0228747	-0.0117526	0.0118623
853967	SRP40	0.0228638	-0.0135267	-0.00159083
855407	STB1	0.022854	-0.00112692	0.00821285
853970	MLP1	0.0228424	0.00527624	-0.00274549
854213	RAT1	0.0228174	0.0065496	0.0155772
852459	TOS1	0.022817	-0.01379	0.00174382
851193	CDC19	0.0227824	-0.00679383	-0.00620912
854755	VHR1	0.0227801	-0.0103177	0.0109511
852678	MDS3	0.02278	0.00575256	0.0105091
850625	RIX7	0.0227578	0.0131725	-0.00269476
851136	CDC73	0.0227461	0.00202965	-0.000480906
855962	FRK1	0.0227453	0.00943675	-0.000199517
851381	PAR32	0.0227211	-0.0131828	-0.00534124
851503	MBP1	0.0227201	0.00115263	0.0149039
854223	ASE1	0.0227102	-0.00379524	0.00190229
852247	RIB1	0.0227079	0.00172301	-0.00544468
852700	SAE2	0.0226991	-0.00252395	-0.0110909
853894	DBP7	0.0226955	0.00577895	-0.00403046
854940	MFT1	0.0226925	0.000154552	-0.00555882
856589	GND1	0.0226919	-0.00859653	-0.00938985
856436	BCD1	0.0226828	-0.00881601	0.00753471
852495	PGI1	0.0226781	-0.00317945	-0.00300337
854151	PLB3	0.022677	-0.0102615	0.00176153
853116	PCT1	0.0226674	0.00366155	-0.00944415
853265	KRE9	0.0226591	-0.0103649	-0.0184028
852258	MCM2	0.0226521	0.0106245	0.00912907
853840	TFA1	0.0226385	-0.0154664	-0.0113709
856247	SCD6	0.0226377	0.0118571	-0.0146952
854671	VHS2	0.0226187	-0.00528172	-0.00579726
852565	SHM1	0.022604	0.0043549	0.00896675
855539	IPI3	0.0225822	-0.00407562	0.00316382
855316	ZDS1	0.022566	0.015174	-0.00444603
850621	ENT4	0.0225606	-0.0172855	0.00646049
850399	SNT1	0.022551	0.012712	0.0164425
856297	NUT2	0.0225504	-0.0160474	-0.00223895
854892	None	0.0225413	0.0101598	0.0134287
853367	PRY3	0.0225256	-0.00188007	0.00259989
855600	NMA111	0.0224994	0.0111263	0.00112739
852905	MTL1	0.0224963	-0.00817593	0.00644312
853369	NET1	0.0224563	0.00184315	0.0195485
853523	CBF1	0.0224552	-0.000670547	0.00385557
850877	SAM1	0.0224366	-0.0121299	0.00538511
852838	RNA15	0.02243	-0.0062788	0.00154705
853539	CDC11	0.0224015	0.00430393	-0.00901926
850419	RSC6	0.0223917	0.0112018	0.00717051
855908	RSA1	0.0223825	-0.0142387	-0.00728873
851471	LUC7	0.0223688	-0.000529523	-0.00901367
855872	None	0.0223588	0.00764746	-0.00596408
856313	DPM1	0.022354	0.00961253	-0.0106346
852576	UBX7	0.0223492	-0.0106722	-0.00794013
856702	VAC8	0.0223319	0.00757581	-0.0181267
854832	RPR2	0.0223185	-0.0123107	0.00596521
855473	RPA49	0.0222933	-0.00585653	0.00402081
852900	None	0.0222915	-0.0136732	-0.0149587
855257	GUA1	0.0222858	-0.000154363	0.00913774
850768	SIC1	0.0222685	-0.0106435	-0.00741911
851153	CNA1	0.0222671	-0.0127198	0.0089893
851096	CSR1	0.02226	-0.00411708	0.00804211
855751	TIM23	0.022253	0.00810579	0.00551699
855358	None	0.0222325	0.000740447	0.0118959
851152	IMD3	0.0222257	0.000935049	-0.00778249
856657	MAK10	0.0222082	0.0038003	-0.00790906
854656	MCM10	0.0222036	-0.00504594	0.0037585
853191	TAF1	0.0222031	0.0146749	0.00726986
855478	SLA2	0.0221982	-0.00647131	0.0137096
850734	STU2	0.0221838	0.0107563	-0.00513808
850719	RAD5	0.0221809	-0.00137479	0.0116899
850504	ACT1	0.0221673	-0.000663667	0.00522747
854945	SML1	0.0221665	-0.00191631	0.0086151
854105	SPE2	0.0221536	-0.00924388	0.0117806
855495	JJJ1	0.0221281	-0.0134978	0.00923547
855135	ILV2	0.0221203	-0.00654773	0.0126199
854280	AZF1	0.022115	0.00238228	0.0101083
850554	RPN11	0.0221087	-0.00915066	-0.0103449
852533	PBP2	0.0221069	-0.000159529	-0.0139164
852457	CDC28	0.022103	-0.00401927	-0.0164321
850297	MRC1	0.0220833	-0.0144981	0.0071562
851649	SED1	0.022069	0.00409019	-0.00557282
850951	YEF3	0.0220665	-0.0076009	0.00548998
855171	SIP5	0.0220622	0.00786313	-0.00557686
851428	None	0.0220621	-0.00911476	-0.00621077
852528	MCX1	0.0220492	-0.0103489	0.00534874
850326	RRP7	0.0220439	-0.010468	-0.0198103
854776	CKA1	0.0220425	-0.0116644	-0.0207916
856612	SCH9	0.0220362	0.0172065	-0.00468163
851332	SEC31	0.0220128	0.00885512	0.00771339
854725	SDS3	0.0220081	-0.0110372	-0.00421855
851907	SSF2	0.0220073	-0.00104841	-0.00986521
853362	TAX4	0.0219992	0.00547716	0.00637805
852974	GCD2	0.021998	0.00218279	-0.00113372
851965	ESC2	0.0219928	-0.00421016	-0.0179347
854525	TYE7	0.0219854	-0.00369969	-0.0192851
854286	RIO1	0.0219704	-0.017076	-0.00776148
851410	COP1	0.0219606	-0.000490343	0.0166283
856607	RPN10	0.0219443	-0.0125919	0.00181514
853847	MAK11	0.021942	-0.00828266	-0.0147098
855764	ALG12	0.0219337	-0.0138739	-0.00303304
855790	ESF2	0.0219326	0.00381366	-0.00464636
856135	YME1	0.0219287	0.0064327	-0.00949919
853441	VTC4	0.0219183	0.0039241	-0.0149204
854258	TMA46	0.0218437	0.00180457	-0.00170298
851676	BMH2	0.0218387	-0.00943011	-0.0126695
854252	OST3	0.0218178	-0.00585761	-0.0186875
856461	SSZ1	0.0218152	-0.00889736	0.00901923
855934	MEX67	0.0218089	0.017149	-0.00238296
854519	RPA190	0.0217991	0.00809802	0.0159979
850334	KCC4	0.0217896	-0.00845138	0.00219996
851962	EAF1	0.0217822	0.00426629	0.012748
855424	PUS4	0.0217523	0.0049375	-0.00159244
853089	PBP1	0.0217453	0.00869929	0.0114716
855650	MLF3	0.0217212	-0.0117027	0.0112109
851375	PCL9	0.0217023	0.00629577	-0.0128884
855025	CLU1	0.0216932	0.00597445	-0.0106072
850306	LRE1	0.0216878	-0.0059901	0.00494998
852665	SPT16	0.0216868	0.0120404	0.0136421
851255	PTA1	0.0216737	0.0110286	0.00659607
856303	VPS4	0.0216616	-0.00679772	0.00412872
854120	None	0.0216475	0.00484853	0.00104361
850521	BUD27	0.0216433	0.0121302	0.0177597
856484	STE12	0.0216424	-0.0134411	0.00166266
851721	SAN1	0.0216351	0.0129117	-0.0152375
852670	KEX1	0.0216296	0.0124144	-0.01695
852960	ART5	0.0216131	0.0167965	-0.00580525
855760	SEC12	0.0216124	-0.00748704	-0.0154531
856505	YPT35	0.021602	-0.00618798	-0.00071672
850822	ACE2	0.0215854	0.00835625	0.00405245
855453	LYP1	0.0215796	0.0105452	-0.00895201
851125	UTP21	0.0215314	0.0115141	0.00923922
854241	CDC21	0.0215179	0.00141421	-0.0146144
855416	TOS6	0.0215082	-0.00765476	0.00904116
851196	FUN12	0.0214961	0.0135328	0.0094902
854881	UTP14	0.0214882	0.00941896	0.0130954
850733	PDC1	0.0214871	-0.000891362	-0.0156493
854414	ABP140	0.021486	-0.00158226	0.013277
851997	SAC7	0.0214859	0.00927843	0.00633759
850691	SSL1	0.0214713	0.00972719	0.00903031
851574	SNQ2	0.0214628	-0.000332643	-0.00517762
856862	RSP5	0.02146	0.00411821	0.00149142
852234	PSY4	0.0214572	-0.00489686	0.0112993
856146	ARP7	0.0214571	0.00162657	0.0137107
851893	BFR2	0.0214566	-0.00370319	0.0101288
854249	WHI5	0.0214535	0.016114	-0.00802235
855492	URE2	0.0214354	-0.0151589	0.00905408
851488	BDF2	0.0214257	-0.0113094	-0.00867237
853048	ENP2	0.0213795	0.011862	-0.00131472
851894	PRO1	0.0213726	0.00709292	-0.00451791
855091	NAT4	0.0213724	0.00385772	0.00287376
852428	CCZ1	0.0213696	0.00595658	-0.0103847
853097	TYS1	0.021357	-0.00319463	0.000486733
854735	RPN2	0.0213523	-0.00561389	0.00493081
850440	PAT1	0.0213491	0.016787	-0.0103664
854508	MIP1	0.0213472	0.0137182	0.00317128
855530	DUG3	0.0213392	-0.00666643	0.000904114
854791	RPB3	0.0213217	-0.0045892	-0.0149507
851204	MYO4	0.0213214	-0.00707299	0.00798275
854957	GSF2	0.0213131	-0.00624865	-0.0132878
850982	DBP9	0.0212949	0.00635063	0.00211748
852214	SEF1	0.0212766	0.0159435	-0.00688524
852871	PDR1	0.0212694	0.0117439	-0.00649548
851767	SND1	0.0212597	-0.0143841	0.0138039
854017	SPT20	0.0212537	-0.000181881	-0.0175271
854659	SLN1	0.0212525	0.0106888	-0.0107416
852547	ISW1	0.0212516	0.0147201	0.00387974
853222	NUC1	0.0212423	0.0010087	-0.0208529
852099	PAC11	0.0212176	0.016439	-0.013263
853581	STE24	0.0212055	-0.00401845	-0.00606737
855136	MYO5	0.0211806	0.0162228	-6.99379e-05
855837	YAR1	0.0211803	-0.0113504	-0.0115667
854507	SCD5	0.021177	0.0097317	0.00567314
851993	EFT2	0.0211708	-0.00147771	0.0189708
852014	MRP20	0.021156	0.000527189	-0.0194782
853319	MTC1	0.0211393	0.0141567	-0.00133408
852226	TOD6	0.0211215	0.00179936	0.00907337
853569	ADO1	0.0211157	-0.013879	0.00437433
854953	SUR7	0.0211079	-0.00968562	-0.0161216
851695	TMA64	0.0211063	0.00213729	-0.0045261
854886	UFO1	0.02109	0.0102006	-0.0129045
853181	MES1	0.0210815	0.00582643	0.00706794
852963	UPF3	0.0210737	-0.00582307	-0.00486335
856674	RAD23	0.021069	0.0158946	0.00225426
850329	RNQ1	0.0210652	-0.00653083	0.00621021
855443	CAF120	0.021065	-0.00341335	0.00946738
850758	MEF1	0.021062	0.00284143	-0.0215153
851220	DEP1	0.0210524	-0.00695558	0.0146659
854778	BCY1	0.0210228	0.0126155	-0.00552161
856077	TRM44	0.0210004	0.0127394	-0.00323882
852228	SAS3	0.0209924	-0.0118485	0.00606592
852126	None	0.0209864	0.0133832	-0.0105108
850846	ACS2	0.0209828	-0.00790391	0.00445161
851904	GIC2	0.0209772	-0.0123664	0.0019538
854829	SQT1	0.0209744	-0.0054818	-0.00801237
851449	None	0.0209642	-0.0053774	0.0136413
850830	SLS1	0.0209033	0.00920077	-0.010838
851771	RVB1	0.0208957	-0.0180405	0.000246738
852169	PKC1	0.0208601	0.00160131	0.00986103
853665	OXP1	0.0208549	0.00715964	0.00811821
856012	NOG1	0.0208507	0.0130845	-0.00515195
854331	MTR10	0.020809	0.0149941	0.00639842
851383	GLT1	0.0208044	-0.00562654	0.00733772
855789	NOG2	0.0207996	0.00189243	-0.000247245
853107	PDX1	0.0207816	0.00269037	0.00593791
855512	SSB2	0.0207768	-0.00583647	0.0132347
856508	GGA2	0.0207691	-0.00374278	0.00575657
856147	GLN1	0.0207528	-0.00879654	-0.0136611
854888	ALO1	0.0207411	0.00569556	-0.00899822
855661	YDJ1	0.0207048	-0.00211804	0.0108158
853155	PFK1	0.0207001	0.000738885	0.00367955
855939	MLH3	0.0206889	0.00972414	-0.0141277
853682	EBP2	0.0206829	0.0107246	-0.000883653
852984	DBF2	0.0206807	0.0155876	-0.00102214
853397	MTR4	0.0206784	0.0118033	0.0116895
853196	SCW4	0.0206683	0.000288405	-0.0195539
852363	None	0.0206445	-0.00775311	7.02868e-05
856091	SWI1	0.0206336	0.0015769	0.0119659
855873	CET1	0.0206321	0.00093654	-0.0156687
852611	DOC1	0.0206183	-0.00688054	-0.00663911
856822	DOT6	0.0206103	-0.00896996	0.0147692
854024	PPM2	0.0206042	0.0167847	-0.0116279
851195	RBG1	0.0205875	-0.0141327	-0.00480563
855395	VNX1	0.0205857	0.0108304	0.00507241
855196	HLJ1	0.0205799	-0.0128547	-0.0141305
855506	IES2	0.0205662	0.00342485	0.00595689
854469	RRS1	0.0205557	-0.0115106	-0.00425159
850432	ATG15	0.0205491	0.00926639	-0.00669228
851818	HEM1	0.0205459	0.0105011	0.00339329
855502	ALG9	0.0205408	-0.0079835	-0.0104502
850923	BUR2	0.020506	-0.0025857	-0.0140388
854653	RRD1	0.0204929	0.00393186	0.00429447
852282	UTP20	0.0204918	0.00575296	0.0156999
855335	HAS1	0.0204743	0.00461075	0.00624719
855259	ESC1	0.0204615	-0.0075731	0.00441589
851157	DIF1	0.0204411	0.0011709	0.00383045
850540	SMC1	0.0204233	-0.00393845	0.0112499
854822	PAN1	0.0204186	0.00952169	0.0145637
853990	ALR1	0.0204016	0.00999696	0.0127267
851150	SEN1	0.0203714	0.0107769	0.0156468
854188	AHC1	0.0203603	0.0137348	0.00308438
850746	MNL2	0.0203518	0.0109016	-0.0045304
851724	SWI5	0.0203413	-0.000428275	-0.00784946
856201	SUA7	0.0203364	-0.0220627	-0.000926715
855749	SMM1	0.0203301	0.00405064	-0.00325652
853914	None	0.0203294	0.0100757	-0.00627698
854461	RRP36	0.0203243	-0.00251623	-0.0235102
855068	ERB1	0.0203237	0.00485365	0.00575274
855591	KRE33	0.0203224	0.00914297	0.0157651
855894	TYW1	0.0203084	-0.00776129	-0.0141783
852762	CDC20	0.0202991	0.0170316	-0.00387367
851752	SUP35	0.0202977	0.0113584	-0.0047847
856412	DED81	0.0202947	0.00131709	0.01457
855819	CLN2	0.0202803	0.0069975	-0.00213188
854493	SFG1	0.0202687	-0.0106896	-0.0144364
853554	BUD4	0.0202442	0.014868	0.00242424
854477	RAX1	0.0202038	0.000783673	0.0042792
855977	NAN1	0.0201973	0.0125472	-0.000836092
854844	YVH1	0.0201815	-0.00475992	0.0115662
850403	PHO87	0.0201547	-0.00213538	-0.0184269
852673	MCM6	0.0201423	0.00671993	0.0143662
851324	ACK1	0.0201422	-0.0136238	0.0078681
854244	RTS2	0.0201257	-0.00739031	-0.00728662
856062	VPS16	0.0201218	-0.00594885	-0.00146148
854988	None	0.0201174	-0.0115568	0.008683
850650	PSR1	0.0200797	0.00766173	-0.0125328
852539	PRP5	0.0200565	0.00615215	-0.0146798
855247	HFA1	0.020054	0.0162681	0.0102086
855665	ARP5	0.0200152	0.00412503	0.0114999
852196	ALG3	0.0200079	-0.00141111	0.00254374
855228	SGS1	0.0199932	0.00994891	0.0136845
854876	VPS9	0.0199799	0.000365238	3.3328e-05
850641	KNS1	0.0199749	0.0161012	-0.00588009
854075	REX4	0.0199727	-0.00120186	-0.00711191
855646	NIS1	0.0199389	-0.00866367	0.0173979
851306	CDC13	0.0199311	-0.00194423	0.0186471
855644	EOS1	0.0199156	-0.0138858	0.00197541
851593	None	0.0199102	-0.00810072	-0.00778521
855922	TCO89	0.0198956	-0.00828076	0.0111854
855739	VPS27	0.0198947	0.00815525	0.010564
856733	HEM14	0.0198946	0.00515383	-0.0133303
850611	PRE4	0.0198823	-0.00990919	-0.0168071
855586	EAF7	0.0198698	0.010518	-0.00411149
850520	EPL1	0.0198652	-0.0151976	0.00154149
856925	PDA1	0.01985	-0.010763	-0.00230109
856481	LRP1	0.0198188	-0.0108783	-0.00985713
851947	SVF1	0.0197741	-0.00500866	-0.0133549
854327	NFI1	0.0197492	0.0166385	-0.00251581
856801	RNR1	0.0197421	0.00273718	0.0128098
850805	AVL9	0.0197344	-0.0186645	0.00341484
856368	None	0.0197332	-0.0105029	-0.00638163
853997	HRP1	0.0197124	-0.0170208	0.00131123
855097	RCO1	0.0197116	0.00488311	0.00274415
855742	LRO1	0.0197014	0.00246781	0.000924538
852259	PIM1	0.0197006	0.0165459	0.0030832
850539	CDC4	0.0196913	0.0149921	0.0112255
854915	TUB3	0.0196878	-0.01322	0.00262702
855347	ATM1	0.0196602	0.001539	0.0204934
851084	SSQ1	0.0196532	0.0160123	-0.00599478
850420	THR4	0.0196347	-0.00539554	0.00669514
853293	RPA34	0.0196345	-0.0156163	-0.00930613
855149	ADE17	0.0196025	-0.00753011	0.00298698
854652	IMP2'	0.0195617	0.00259923	0.00718959
851210	PMT2	0.01955	-0.00419404	0.00102662
855208	HOT1	0.0195403	-0.000615565	0.00090786
856398	ERG11	0.0195325	-0.0158574	-0.0125581
854827	DSN1	0.0195263	0.0133108	-0.0150968
852202	ILS1	0.0195156	-0.00462549	0.0127455
853985	MED7	0.0194992	0.00413386	-0.00330245
853118	ADE3	0.0194978	-0.00304276	0.019548
850427	BUD31	0.0194926	-0.00313604	0.00242208
856126	TIF6	0.0194756	-0.0104672	-0.0139347
850783	GIS3	0.0194629	0.0159355	-0.00980066
856298	JIP5	0.0194606	-0.0112099	0.00538553
850550	DEG1	0.0194263	-0.0157107	-0.00627141
854190	HST3	0.0194221	-0.00116599	0.00287693
851417	RGT2	0.0194183	-0.00434253	0.0136793
850872	CBF5	0.0194037	-0.00849845	-0.00554936
856604	RIX1	0.0194034	0.00897475	-0.00307266
851942	RRS1	0.0193968	-0.00582818	0.0168374
852193	BOI1	0.0193961	0.00174342	0.00718758
850984	None	0.0193914	-0.00161442	0.00606602
850706	PSR2	0.0193785	0.00672315	0.00210084
850442	SRB8	0.0193694	0.0197008	-0.00274474
854811	YIA6	0.0193518	0.00561875	-0.00688751
856553	IMP3	0.0193513	-0.0119615	-0.00205376
850946	CDD1	0.0193439	-0.0135	0.00559674
856199	None	0.0193185	-0.000196227	0.00964508
855998	SSE1	0.0193135	-0.0055542	0.000811197
850884	SKG3	0.0193093	0.0152777	-0.00713177
854277	TFC7	0.0192892	0.00786112	-0.000972655
853643	DPH2	0.0192821	-0.00541975	0.0154382
856065	SSN3	0.0192542	-0.0133885	-0.00219146
856597	ERG9	0.0192415	-0.012334	0.00092151
851935	MSN5	0.0191976	0.00529463	0.0129055
850712	SNF7	0.0191938	-0.0123147	-0.00767078
850328	BIK1	0.0191907	-0.00851838	0.0185621
853848	SPT23	0.0191574	0.0131059	0.00538723
856813	AIM9	0.0191459	0.00337967	-0.00632298
852623	SHE10	0.0191324	0.00639642	-0.010707
856649	PRB1	0.0191318	-0.00464086	0.00306246
856309	HDA3	0.0191023	-0.00447499	-0.0109464
855220	RGM1	0.0190975	-0.00264166	0.0155225
856556	MTC6	0.0190901	-0.0121606	0.00787186
853668	SAC1	0.0190889	-0.0196597	-0.00143882
856167	SMK1	0.0190802	-0.0111595	0.000885146
853016	NUP57	0.0190667	-0.0126681	-0.0086798
852077	PKH3	0.0190598	0.0149192	0.0149259
855691	IDH1	0.0190481	-0.00087388	-0.0059313
853974	BAS1	0.0190126	0.0164365	0.00932181
850451	FIG2	0.019004	0.00507587	0.0125283
852351	AKL1	0.0190037	0.0112928	0.00412374
856158	THP3	0.0189975	0.00821458	-0.0137222
852357	ECM2	0.0189966	-0.010123	-0.00283617
855554	SKO1	0.0189916	0.00614752	0.0121662
850530	MDJ1	0.0189775	0.013954	-0.00671784
852141	HLR1	0.0189771	-0.010006	0.000695376
855490	PDR16	0.018952	-0.00494384	6.52119e-06
856720	PMI40	0.0189381	-0.0150459	-0.000247258
850773	RAX2	0.0189335	0.00985726	-0.00198605
852273	None	0.0189308	-0.00320394	-0.00686811
854192	STI1	0.0189308	0.00620369	0.00597705
850704	MEU1	0.0189236	-0.00890922	-0.00266871
853522	PTK2	0.018921	-1.04636e-05	-0.00507921
856489	GAR1	0.0189135	-0.0128648	-0.0138243
854942	OGG1	0.0189101	-0.00204319	-0.0119875
853033	PHB1	0.0189066	-0.000555292	-0.0247496
850495	SWP82	0.0188849	-0.0087029	-0.00396231
850538	WWM1	0.0188715	-0.0104016	0.00536016
854059	RFC4	0.0188672	0.00598437	-0.0142568
853487	RBH2	0.018864	0.0114118	-0.0116729
850552	NIC96	0.0188536	0.0119376	0.0147162
850647	PUF3	0.0188508	0.0133922	-0.01095
850370	PGK1	0.018828	-0.0142171	-0.0128815
854271	PIN2	0.0188155	-0.00750436	-0.0220705
850744	SPT8	0.018813	0.00762295	0.021429
853144	SMI1	0.018808	-0.0139342	-0.00599384
852951	ERG25	0.018799	-0.0182167	-0.0131193
856050	SUR1	0.0187845	-0.018459	-0.00716735
853984	PFK27	0.0187835	-0.000652802	-0.00542091
852569	REI1	0.0187788	0.00966487	-0.00110815
856255	RRP9	0.0187716	0.0144001	-0.00821646
850973	SEC22	0.0187489	-0.0151958	-0.00931252
850811	YPS1	0.0187427	0.00078342	-0.00934796
855774	DBP6	0.0187427	0.000919096	0.0141437
854660	ATG32	0.0187393	0.000975694	0.0121315
851320	GLE1	0.0187382	-0.00644164	0.0149711
851032	SFH1	0.0187333	-0.0168051	-0.00949387
854899	WAR1	0.0187307	0.00875221	0.00584908
851387	NRP1	0.0187291	0.00823032	0.00628065
853114	ELP2	0.0187034	0.021797	0.00107052
854831	None	0.0187031	0.00135432	-0.012252
854245	BUD21	0.018692	-0.0207831	-0.00945971
853996	TRM11	0.0186741	-0.00734538	0.00779098
855483	KEX2	0.018669	0.0177233	0.000512215
855867	CUB1	0.018667	-0.00241421	-0.0104961
856537	YCK1	0.0186644	0.00175991	0.0126859
850919	UTP13	0.0186585	0.00104202	0.00422128
856677	HYP2	0.0186495	-0.0158989	-0.00440019
850296	VAC17	0.0186452	-0.00725657	0.00519237
856315	ATG13	0.0186321	-0.0019794	0.00049908
856399	SOD2	0.0186306	-0.00658313	-0.00480001
851701	INO2	0.0186174	-0.0109388	-0.00692449
856575	NMD3	0.018617	-0.0116138	0.00390019
850878	VTA1	0.0186141	0.000263647	-0.00303262
850632	ISA1	0.018596	-0.0145455	-0.00426701
853688	TPK3	0.0185899	0.00235595	-0.0175863
851095	SEC61	0.0185882	0.00545126	-0.00544034
852326	CHS2	0.0185827	-0.00313407	0.000398234
853589	ENT3	0.0185744	0.00367949	-0.00856065
851322	HEM3	0.0185574	-0.0181941	0.00457375
856920	RAD24	0.0185424	0.00755883	-0.0113294
855089	UBX4	0.0185094	-0.0020172	-0.0124069
854211	DBP5	0.0184847	-0.0232095	-0.0016435
850298	KRR1	0.0184705	-0.0154086	-0.00344936
856914	BCK2	0.01847	-0.0156969	-0.000407546
852004	SXM1	0.0184612	0.013859	0.0041772
854021	NOP8	0.0184597	0.0134192	0.00983957
853076	TRS65	0.0184576	-0.0106976	-0.00129228
853313	PBS2	0.018456	0.0187887	-0.0150441
855099	PDS5	0.0184517	0.0113831	-0.00564321
851431	CDC48	0.0184489	0.0131948	0.00288535
854874	ARG81	0.0184443	0.0124386	0.0101525
852322	HMT1	0.0184406	-0.00412839	-0.00635165
855745	PRP2	0.0184343	0.0159295	0.013025
852050	DOT1	0.0184082	0.00427409	-0.00280271
852973	TOM20	0.0183897	-0.00469906	-0.0183523
855264	MRE11	0.0183735	0.00900016	0.00457939
851404	RPC53	0.0183716	0.0140696	0.00690561
852030	HKR1	0.0183596	0.00271094	0.0175798
854056	WRS1	0.018344	-0.0153918	-0.00294202
856923	ECM32	0.0183406	-0.00999968	0.0227578
855852	None	0.018328	-0.00331735	-0.00330616
852592	SNF5	0.018313	0.0107417	0.00954076
851687	None	0.0183009	0.0147239	-0.00899793
856264	RRP15	0.0182888	-0.00721738	-0.00933699
855613	NOP15	0.0182855	-0.0112089	-0.0186209
855649	IMP4	0.018214	-0.0130143	-0.00761959
854993	TAF11	0.0182062	0.00356061	-0.0147145
851730	GIR2	0.0182	-0.00894384	-0.0076772
850502	FET5	0.0181853	0.00413956	-0.0123682
856758	ARB1	0.018184	0.00110714	0.0131578
852654	MDM34	0.0181819	0.00533462	-0.0063082
853513	BFA1	0.0181785	0.0103602	-0.0101547
853337	None	0.0181675	-0.0110494	0.0042465
854421	SRL1	0.0181482	0.00218001	0.0123358
856864	LCP5	0.0181274	0.00431131	0.000717049
854504	MYO2	0.0181215	-0.0208426	-0.00250189
851407	NOP14	0.01812	0.00767458	0.0103124
853428	RRN7	0.0180754	-0.00385873	0.014335
854566	FRE5	0.0180624	0.00637463	0.0039974
853503	SSC1	0.0180585	0.00505653	-0.0135213
852452	CNS1	0.0180564	0.00484503	-0.02175
854518	RPA43	0.0180316	0.00917011	-0.0127238
854688	RHO3	0.0180312	-0.00610097	-0.0247967
854381	NOC2	0.0180285	-0.00719561	0.00769746
854119	PRE6	0.0180162	-0.0157232	-0.0171822
853712	RPT1	0.0179843	-0.00990864	0.0122873
854515	TEA1	0.017978	-0.000983182	0.0202051
850320	SRO9	0.0179672	0.0152406	-0.0134973
850935	TOP3	0.0179636	-0.00623198	0.0154475
851548	NOP1	0.0179601	0.00721949	0.00622724
852945	None	0.0179429	0.0208237	0.000237245
851569	SOK1	0.0179191	0.0198115	-0.00398133
854537	GDS1	0.0178965	-0.0105575	-0.00580303
854220	VHS3	0.0178897	-3.00611e-05	0.00931971
850760	RGR1	0.0178601	0.0203416	-0.0104379
850567	IOC3	0.0178586	0.00175041	0.019137
852856	SCW11	0.0178557	0.00292804	-0.010701
854360	MSB1	0.0178389	0.00151835	0.0141238
851729	CTH1	0.0178374	-0.0148461	-0.00563309
853458	MPP10	0.0178144	0.0136429	0.00968346
851302	WHI4	0.0177902	0.0154719	0.0064911
856664	FRD1	0.0177841	0.000991544	0.00185727
851414	BPL1	0.017784	0.0106748	0.011201
855280	RNT1	0.0177255	-0.00295593	-0.0165793
852353	TRM7	0.0177202	0.00519298	-0.0152224
856251	SPN1	0.0177137	-0.0079255	0.00293026
855752	RCF2	0.0177137	0.00254465	-0.00821814
855761	BUD17	0.017689	-0.0161728	-0.00867279
856044	ALD6	0.0176442	-0.00164181	-0.00647861
850916	MSC3	0.0176384	-0.0120767	0.0124004
856071	PMA2	0.0176352	0.00421306	0.0057266
851459	BUG1	0.0176254	-0.0179465	0.0078967
850505	YPT1	0.0176212	-0.0210922	-0.0114148
852797	SCY1	0.0176034	-0.00655056	0.002278
855267	TAF7	0.0175808	0.0161699	0.0163866
853635	PTK1	0.0175793	0.0172396	-0.0026298
854094	MAM3	0.0175589	-0.00776809	-0.00115084
852612	CSE1	0.0175355	-0.00713854	0.0243444
853285	SSY5	0.0175277	0.00328154	0.00256636
852049	LRS4	0.0175253	-0.0163131	-0.00158388
854919	NDI1	0.0174743	-0.0057158	-0.00764976
856141	APL4	0.0174626	-0.0172726	0.00837416
856019	ELP3	0.0174565	0.0161183	-0.00213402
850510	MIL1	0.0174439	0.0196563	0.00487318
852862	STT3	0.0174163	-0.00146825	0.00846224
855611	DBP2	0.0174121	0.00594257	0.00689804
856387	HSE1	0.0174112	-0.0086262	-0.0120005
855919	RTT10	0.0174033	0.00666042	0.013517
852726	NUT1	0.0173928	0.00954634	0.0105566
850762	RFU1	0.0173802	-0.00323397	-0.0164394
854248	TGL5	0.0173783	0.0030317	0.025452
851521	NAT1	0.0173671	0.0107559	0.0137131
855964	UME1	0.017364	0.0140641	-0.00915942
850323	LSB5	0.0173595	0.00696066	-0.00836141
855055	SUB1	0.0173567	-0.0210168	-0.00359506
851499	TSR1	0.0173543	0.0133561	0.00923354
855520	PSY2	0.0173527	0.00263764	-0.00137615
856671	UTR2	0.0173369	-0.0085091	-0.00310358
850752	BMT6	0.0173346	0.00541855	-0.0009591
851723	TAF12	0.0173125	-0.0204396	0.00861828
854913	ERG13	0.017299	-0.00333586	-0.00214943
851775	MSS116	0.0172933	0.00907208	-0.0233398
855821	HFI1	0.0172818	-0.00665402	-0.00652914
855895	PGC1	0.0172503	-0.00481033	-0.0148214
854170	SLG1	0.0172487	-0.0206164	-0.00502195
856721	FMP52	0.017239	-0.0088247	0.00121556
854283	RPO31	0.0172332	0.0111743	0.0238149
854232	MSA1	0.0172258	0.0031983	0.014316
851338	RBS1	0.0172198	0.0153724	-0.00917198
855704	CRZ1	0.0172107	0.00269979	-0.000702343
851365	MFG1	0.0171932	0.00302859	0.00695243
855656	FKH2	0.0171801	-0.000750001	0.0183238
853385	NUP82	0.0171715	-0.0132243	0.0157959
852385	POL30	0.0171615	-0.0178808	-0.0114276
854227	CKA2	0.0171611	0.00277582	-0.00105561
850826	SLX4	0.0171539	-0.0032177	0.0058667
854179	RTS1	0.0171321	-0.00383851	0.00568553
851737	SAC3	0.0171202	0.00978804	0.0159207
856845	FLO8	0.0170997	-0.00505	0.0127447
855568	YCK2	0.0170882	0.00927081	0.0086055
852616	MTO1	0.0170878	0.016381	-0.00532343
854434	GCD1	0.0170866	0.00261626	0.0209935
851221	CYS3	0.0170831	0.0116551	0.00403247
851834	VHS1	0.017068	0.0101763	-0.00572544
856219	FHL1	0.0170565	0.00467981	0.0189496
856057	MNN9	0.0170449	-0.0149966	-0.0209416
852205	AAR2	0.017	-0.0152255	0.00909225
853846	CDC16	0.0169634	0.00376488	0.00210373
852249	SHE1	0.0169525	-0.00425404	-0.00437564
856384	MRP4	0.0169182	0.0140782	-0.0180438
856231	RGC1	0.0168989	0.0147802	-0.00356166
854780	ULP2	0.0168919	-0.00926455	0.0233935
855561	CBK1	0.0168822	0.0120622	0.0156438
854926	TAF8	0.0168443	0.0193689	-0.000997417
856771	SAP1	0.0168265	0.000917411	-0.000186775
853575	PXP2	0.0168248	0.0128634	0.00896948
856579	ENO2	0.0168097	-0.00737434	0.0022938
853303	TIF2	0.016805	-0.00245839	0.00482144
855003	ERG6	0.016802	0.00798951	-0.0121221
853946	SIS2	0.0167985	0.0186229	-0.0024094
853317	GCD14	0.0167914	0.0129762	-0.0124731
854683	SIM1	0.0167769	0.0137998	0.00316336
855944	PET20	0.0167557	-0.0119784	0.000298757
855114	YTA12	0.0167536	0.00498141	0.00061251
853438	CCT3	0.0167342	0.0146735	0.0114844
854952	None	0.0167304	-0.0206573	-0.00989356
850903	ENT2	0.0167216	-0.00700959	0.0051034
853064	NSR1	0.0167118	0.00241555	-0.00574275
854256	VPS21	0.0166945	-0.0159711	-0.00410773
852638	FZF1	0.0166912	-0.00899653	-0.00261428
851286	SWH1	0.0166424	0.0113221	0.00805762
853292	DAS1	0.0166264	-0.00377846	0.0201406
856741	GPA2	0.0166226	0.0100302	-0.00916088
855018	PLB2	0.0166027	0.00181381	-0.00146056
851207	DRS2	0.0165698	0.0016032	-0.00887242
852248	HEK2	0.0165693	0.0132068	-0.020628
855605	DCP2	0.0165639	-0.00848882	0.013271
855782	TRM112	0.0165535	-0.00299297	0.00114624
856351	SBP1	0.0165289	0.0122581	-0.00482714
856817	GET2	0.0165254	0.00287786	-0.00744671
855580	MEP2	0.016509	0.0066597	-0.00531062
851815	IVY1	0.0164984	0.00542833	0.0090509
856166	None	0.016484	-0.00075291	-0.00288974
855609	RPC19	0.0164838	-0.0136747	-0.0167961
851411	None	0.0164505	0.0103587	-0.00886549
855743	NRM1	0.0164465	0.00161523	0.00835704
852305	KAP104	0.0164435	0.0189847	0.00933298
3799976	None	0.0164414	-0.0231467	0.000716521
854747	YRB2	0.0164347	-0.0197925	-0.0141474
856924	BMH1	0.0164285	-0.0156838	-0.00830008
850788	ICT1	0.0164253	0.0121644	-0.0170651
853271	SET2	0.0164219	0.00635439	0.00610775
850820	DIP2	0.0164058	0.0136162	0.0110556
856037	None	0.0163938	0.00116927	0.00875664
855898	TPK2	0.0163869	-0.00526933	-0.0174814
856129	RLF2	0.0163815	0.00838424	0.0105057
855200	MSS11	0.0163632	0.0110983	-0.00444188
855564	PGA1	0.0163624	-0.0140924	-0.00899657
850643	DPS1	0.0162941	0.0179321	-0.00910116
855750	ACC1	0.0162857	0.00492042	0.00711403
854128	None	0.0162819	-0.007291	0.00651443
852003	RPT3	0.0162714	0.0105529	0.00511031
854980	TSA1	0.0162633	-0.0197594	0.00202578
853406	GYP6	0.0162542	-0.010915	0.00585722
854647	BNR1	0.0162338	0.0110398	0.0130778
850824	CKI1	0.0162289	0.0097341	-0.00272254
855202	MME1	0.0162277	0.0158042	-0.0160149
856596	PTH1	0.0161941	-0.0008826	0.010299
851757	UBC1	0.0161896	-0.017886	-0.0169791
856563	KEL1	0.0161635	-0.0135413	-0.00793687
855480	ZWF1	0.0161575	-0.000665423	0.0159678
852847	None	0.0161471	-0.000902022	0.0178253
855771	ARC35	0.0161188	-0.0214862	-0.000620024
850507	RPO41	0.016109	0.0156302	-0.00606107
854758	GPP1	0.0161053	-0.00984008	-0.0108232
854553	GPB1	0.0161023	0.00761905	0.00116236
855660	AQR1	0.016099	-0.0048469	-0.00521948
855619	LEU4	0.0160983	-0.00450231	0.0134691
853823	PHD1	0.0160962	0.000780361	-0.00767884
856756	None	0.0160708	0.0109199	-0.00357693
854050	ITR2	0.0160663	-0.0188147	-0.0044687
855948	KIP2	0.0160638	0.0175318	-0.00134063
852816	MRH4	0.0160473	0.0150086	-0.0165481
855219	None	0.0160408	0.00125604	0.000430158
855865	KEL3	0.0160287	0.00808274	0.0236093
853298	TIM17	0.0160208	-0.00879724	-0.0134792
850636	SSA2	0.0160014	-0.00751935	0.010985
854364	THI72	0.0159973	0.00451868	-0.00369378
856588	None	0.015983	0.00745496	0.017065
851501	USO1	0.0159691	0.0155209	0.00722606
854480	ISW2	0.0159513	-0.00565307	0.0194472
851533	MPS1	0.0159425	0.0152179	0.0053371
851561	MCD1	0.0159417	-0.00453089	0.000329689
852451	RPB5	0.0159329	-0.0206498	-0.0112467
851998	UBA2	0.0159187	-0.00325711	0.0120028
854557	GDH1	0.015913	0.00481507	-0.0124578
856321	QCR2	0.0159028	0.00164487	-0.0132218
851208	MAK16	0.0159018	-0.00133557	0.00519846
850609	RMD8	0.0158945	0.0132912	0.00991398
856212	None	0.0158846	0.000777996	0.0018842
854990	None	0.0158469	-0.0216891	-0.00422652
854055	SDD3	0.015838	0.00426868	0.0187792
851154	TSR2	0.0158278	-0.0126598	-0.00553896
853820	DCW1	0.0158166	-0.014022	-0.00848199
856814	SER3	0.0158052	-0.00482305	-0.0122884
855950	RAD53	0.0158013	0.00911914	-0.011543
853358	TRL1	0.015772	0.0208972	-0.0133107
850508	MOB2	0.0157624	-0.0105871	-0.00751192
854068	ADH1	0.0157622	0.00085489	-0.0112397
854680	STH1	0.0157566	0.00218974	0.0247245
855945	AIM44	0.0157278	0.0176965	-0.0150535
856030	GCR1	0.0157102	0.00881877	0.000737841
854749	SNP1	0.0157067	0.00732882	0.00247126
854053	PKH2	0.0156937	0.0136339	-0.00729984
850980	MCM5	0.0156864	0.00255819	0.0141723
856692	URA3	0.0156814	-0.00192835	-0.00580951
855355	GAS1	0.0156694	-0.0180794	-0.0109296
850966	YPT6	0.0156614	-0.0218447	-0.0151348
851824	SEC26	0.0156553	0.00817746	0.00985584
853553	JSN1	0.0156535	0.00251281	0.00313655
1466438	None	0.0156346	-0.0214924	-0.0150342
851002	ATP14	0.0156205	-0.0111734	-0.0130634
854231	CYT1	0.0156081	-0.00985027	-0.0176177
855906	APL5	0.0155691	0.00596724	0.00304879
856509	CTM1	0.0155611	0.00180347	-0.0150195
855501	ADE12	0.0155562	-0.0147796	-0.015046
850992	CTS1	0.0155448	-0.0186953	0.0188748
854383	PTP2	0.0155372	0.00281683	0.00863538
855967	GIP3	0.0155324	0.0184978	0.00014421
856366	OPI1	0.0155274	-0.0124465	0.00187963
853670	UBA1	0.0155047	0.0023111	0.00162338
855891	SRP72	0.0154752	-0.0217284	-0.00586828
854265	NUP1	0.0154752	0.013148	0.022781
856042	TIM50	0.0154706	0.013425	-0.00511211
850963	HSP60	0.0154549	0.0159176	-0.0134826
850944	GPN3	0.0154399	-0.0111221	-0.0136714
850964	LCB5	0.0154309	0.00308764	0.0157078
851820	LYS4	0.0154105	-0.0152857	0.0202295
855085	RIM9	0.01541	0.00362235	-0.0152993
853045	SKN1	0.015395	0.00975278	-0.0100893
856551	CRP1	0.0153947	-0.0249032	-0.00100624
850616	IRC7	0.0153753	-0.00541353	-0.00280558
855630	APP1	0.0153626	0.00922045	0.0154093
852180	BRN1	0.0153478	0.0218294	-0.00817874
856844	GLE2	0.0153388	-0.020463	0.0122627
854396	MCT1	0.0153387	0.016672	-0.010693
855827	GYP5	0.0153345	0.0203963	0.000362884
856420	THR1	0.0153306	0.000602016	0.0144601
850449	None	0.0153249	-0.000133276	-0.0111451
852177	ATP1	0.0153183	-0.00573619	-0.0127369
852116	PSP1	0.0153044	0.00332273	-0.00388202
853843	PAN3	0.0153037	0.00674367	0.0166988
851607	KRS1	0.015295	0.0126091	0.0069479
855746	URK1	0.0152919	0.00406065	0.0154653
853884	YPT52	0.0152846	-0.0171482	-0.00918456
852519	PYC2	0.0152618	0.0176281	0.00415916
853056	RSR1	0.0152553	-0.0251177	-0.00330594
850778	ALT1	0.0152525	0.00657845	0.0154318
855540	PBR1	0.015233	-0.0220639	-0.000945317
853641	SDS22	0.0152034	0.00199167	-0.0186873
852750	SOH1	0.0152008	-0.0145943	-0.00521432
855985	MRP51	0.0151865	0.00516394	-0.0225274
856731	PRE1	0.0151856	-0.00725301	-0.0179217
854786	IRR1	0.0151822	0.0172364	0.00143672
850312	EMC1	0.0151261	-0.0107401	0.00616018
856846	KAP123	0.0150968	0.00363469	0.0203645
851137	None	0.0150914	0.0175442	0.0141018
853490	RAV1	0.0150826	0.0198533	-0.00195613
854115	NGL1	0.0150605	-0.0133937	-0.00116195
852439	MAK5	0.0150505	0.0125011	0.00673629
852257	NCL1	0.0150385	0.0192181	-0.00487342
851025	NKP2	0.0150058	0.0130728	-0.0121711
851309	TIM22	0.0150025	-0.0165824	-0.0137713
854814	CFD1	0.0149521	-0.0136887	0.00218585
855800	None	0.0149433	0.0131306	0.00980446
851429	VCX1	0.0149381	-0.0208844	0.000644812
851524	BSC1	0.0149192	-0.0101724	0.00603612
852035	SNX41	0.0149182	-0.00720414	0.00213613
850348	ILV6	0.0149137	0.0111137	0.00536192
853392	TIM54	0.0149132	0.0165168	-0.00642814
856837	UBC6	0.0148871	-0.00447104	0.000576434
855725	SIS1	0.01488	-0.0145758	0.00488673
851376	DLD2	0.0148696	-0.00539008	-0.00193349
854637	CSS1	0.0148579	0.0097477	-0.0220189
854793	FAF1	0.0148459	0.011289	0.00351125
856689	RIP1	0.014833	-0.0107953	-0.0169235
855010	None	0.0147764	0.00915231	-0.0147448
852222	SHP1	0.0147523	0.0133369	0.0144033
856277	PIN3	0.0147512	-0.0128562	-0.00130582
856223	RPN7	0.0147348	0.00794884	-0.00267751
854195	DFG16	0.0147318	-0.00770827	0.0109506
855248	ERG12	0.0147305	0.00284957	0.00247508
852809	AFT1	0.0147132	-0.00146154	0.0112603
855368	ADH6	0.014705	-0.0120547	0.00429587
856243	YLH47	0.014698	0.00850605	-0.00118926
856546	DSE2	0.0146862	-0.0054921	0.015648
850441	PTC6	0.0146835	0.0170013	-0.0164114
856870	GLC7	0.0146827	-0.0207427	-0.0194699
854809	URM1	0.0146771	-0.014458	-0.0108098
854404	WTM2	0.0146716	0.00754461	0.0049268
856514	BZZ1	0.0146649	0.00585807	0.00772376
855558	RIA1	0.0146505	0.0118547	0.0213598
853709	SDH1	0.0146442	0.00963692	-0.0147574
854226	SLD7	0.0146361	-0.0236416	-0.00259413
855359	GLC8	0.0146311	-0.0142812	-0.00631331
852889	PRP18	0.0146231	0.00447247	-0.00532872
854446	YTM1	0.0146135	0.00361924	0.0164026
854436	GPN2	0.0146099	-0.00696935	0.000300084
853423	VPS53	0.0146069	0.0167653	0.0081223
853398	CHM7	0.0145874	-0.0145874	-0.0203257
855993	CAR1	0.014581	-0.00228057	-0.00554731
856198	MDM36	0.0145429	-0.00674658	-0.0153414
855653	LAT1	0.0145418	0.00625915	-0.00523844
853602	MET5	0.0145263	0.00454363	0.00954121
851930	UBX5	0.0145239	0.000749443	0.00660516
852109	SEC20	0.0145158	0.00307806	-0.0086379
854174	TIR2	0.014514	-0.00426267	0.00654196
852714	SUT1	0.0145076	-0.00638857	0.00634027
852985	DRN1	0.0145065	-0.00598568	-0.00364305
855403	EMW1	0.0145	0.00898223	0.0258826
855555	BNI5	0.0144986	-0.0197884	0.0126204
852207	KTI11	0.0144883	-0.0119303	-0.0100373
855534	SWT21	0.0144861	0.0190558	-0.0141032
854817	SGN1	0.0144703	-0.0172058	-0.00254914
852875	LEU1	0.0144697	0.00235582	-0.0108392
851464	PMT5	0.0144398	-0.00246795	-0.00754683
856067	ISM1	0.0144227	0.0107914	-0.0086902
850844	PCD1	0.0144172	0.000409285	-0.013232
853333	CCT7	0.014412	0.0142256	0.00854577
855336	TDA1	0.0144079	0.00906202	-0.0145045
854295	ADE2	0.0144078	-0.000204254	-0.00739076
855710	HDA1	0.0144077	0.0176724	0.00717524
853010	DAM1	0.0143897	-0.0138803	-0.00504731
856068	None	0.0143757	-0.0186926	-0.0108881
850587	PTR3	0.0143746	0.00195239	0.0252308
856499	TRA1	0.0143745	0.0198724	0.0135696
856621	None	0.0143649	0.0130776	-0.013559
851625	PST1	0.0143641	0.00179799	-0.0119924
855491	ELA1	0.014363	0.00960987	-0.00185985
851041	CHS5	0.0143557	-0.0220583	0.0185395
856293	MMS1	0.0143387	0.0151149	0.00866386
855585	NAM9	0.0143243	0.00477227	-0.0250288
853030	SYF2	0.0143102	0.00965685	-0.0288719
854441	HRK1	0.0142996	0.00284555	0.0114245
853334	GZF3	0.0142941	0.005885	-0.0051288
850803	HOG1	0.0142655	-0.00831527	0.0127679
856346	EFM1	0.0142605	-0.00130992	-0.0137178
855310	PRP24	0.0142556	-0.0104215	-0.0187284
855426	RFC3	0.0142526	-0.0194274	0.0114044
851953	SBE2	0.0142472	-0.00668153	0.0162161
855014	MIX17	0.0142213	-0.0112959	-0.0145756
854426	TMA16	0.0142087	-0.0106152	-0.0239898
850885	MDL1	0.0142054	0.00292972	-0.00177463
856075	SVL3	0.0142017	0.0193261	0.013786
852663	MIG2	0.0141953	0.0061363	-0.000570044
852685	CDC55	0.0141948	0.00812443	0.0130855
850894	NOP56	0.0141937	-0.01213	0.00313413
851462	PMT1	0.0141846	-0.0136938	-0.00168495
850574	FAB1	0.0141535	0.0188752	0.0162535
854994	TRM9	0.0141438	-0.000954621	0.0146813
851052	RPP0	0.0141229	0.00450763	-0.015237
851688	FOB1	0.0141104	-0.00530675	0.00175422
856557	SPO12	0.0140897	-0.0104423	-0.0112088
852578	RIF1	0.014077	-0.00264343	0.0249594
852359	TIP1	0.0140589	-0.00502018	0.00407186
852440	SUP45	0.0140513	-0.022049	0.000409924
852744	ITC1	0.0140355	0.00894508	0.025224
853335	UTP10	0.0140203	0.0114228	0.0197585
854078	BRX1	0.0140196	-0.0140814	-0.00856557
853166	NOP19	0.0140109	-0.0229953	-0.00383775
853747	RAD27	0.0140053	-0.0218133	0.011193
854964	RRN11	0.0140034	0.000910743	0.00520488
856359	None	0.0139951	-0.00693576	0.00768734
850638	HIF1	0.0139803	0.00731489	0.0207933
851798	TCP1	0.0139725	-0.0100976	-0.00789263
851623	DBF4	0.013971	-0.00105443	0.0244434
855168	PSO2	0.0139096	0.00953519	-0.0056554
855388	MDJ2	0.0139006	-0.00336071	-0.0155177
851209	LTE1	0.0138918	0.0193973	0.00665336
853355	DPB11	0.0138889	0.00676681	0.0192789
850828	RKM5	0.0138852	0.00456301	-0.00803155
854819	AIM21	0.0138672	0.0146317	0.0134909
853053	CCM1	0.0138474	-0.00390352	-0.0184673
851187	YRF1-4	0.0138372	-0.00421021	0.00917766
852814	SGF73	0.0138359	0.0195045	0.00522119
855439	POP3	0.0138191	-0.0192786	0.00873056
853489	CPR7	0.0138156	-0.0124399	-0.00577189
855968	ISU1	0.0138092	-0.0216065	0.00870071
853961	PRP16	0.0137925	-0.00646838	0.0237567
856352	RPL8A	0.0137902	-0.0105521	-0.0153969
852672	ARO8	0.013781	-0.00565849	0.0217632
852091	DIG2	0.0137784	0.00547228	-0.00525652
852521	None	0.0137513	-0.0208275	0.00918803
851051	VRP1	0.0137455	0.0118275	0.0080479
855659	SUN4	0.0137452	0.00749489	0.0100236
852250	PET9	0.0137413	0.00695173	-0.0166427
854309	ARP8	0.0137257	0.0181593	0.0216023
852824	SDS23	0.0137044	-0.00812932	0.0236409
852477	FZO1	0.0136802	0.0161134	-0.0103862
853796	NUP100	0.0136717	0.0204994	0.0115678
853634	MNN4	0.0136574	0.00343398	-0.00467131
852127	SLF1	0.0136558	0.0120606	-0.0259663
856168	SEC8	0.0136195	0.00140218	-0.0111229
853805	FBA1	0.0136063	-0.0205622	-0.00680485
851656	RRP8	0.0135989	-0.00746049	-0.00808187
852786	PAN2	0.0135964	0.0142078	0.0136432
855538	NPR1	0.0135565	0.0203982	-0.00962791
850749	FRS1	0.0135536	-0.00814623	0.018436
856626	IMD2	0.0135454	0.00146521	0.011439
854268	RAS1	0.0135435	0.000583348	-9.11323e-05
856680	MCM3	0.0135364	0.0208778	0.00978251
856775	TPA1	0.0135206	-0.00069161	0.0181196
853760	HSL1	0.0135152	0.00719703	0.0253689
853803	MSN4	0.0135112	0.00865315	-0.0157076
852773	ARC1	0.0135021	-0.00825818	-0.0183082
856603	UTP9	0.0134977	-0.00175133	-0.00254917
850331	HBN1	0.0134905	-0.00052472	0.00317808
856866	SAK1	0.0134894	0.0212583	0.00670707
850642	COX19	0.0134861	-0.0208042	0.00605362
854736	SER33	0.0134844	-0.00866804	-0.00385261
856049	PDR12	0.0134754	-0.00380362	0.00507234
850422	PWP2	0.0134719	0.0195852	0.0151416
856559	RTT107	0.0134713	-0.0168075	0.00994668
854371	LIP5	0.0134555	-0.0130977	-0.0127293
855574	ALF1	0.0134449	-0.00613012	0.00891681
856470	ERG7	0.0134374	-0.00956389	0.023406
855048	HOF1	0.0134337	0.00578631	0.00362875
851787	EBS1	0.0134209	-0.0122898	0.0142362
850763	BUD20	0.0134136	-0.0156943	0.000464821
854731	AIR1	0.0134041	-0.0152194	8.20614e-05
856754	FIR1	0.0133914	0.00152683	-0.0157875
853639	MIA40	0.0133843	-0.00219221	-0.0241631
852516	HPC2	0.0133791	0.00431703	0.0243906
854485	SNU66	0.0133658	0.0136949	0.00432699
850414	BUD23	0.0133509	-0.00584249	0.0204508
850497	RGD2	0.0133493	-0.00555748	-0.00474421
855930	MRPL40	0.0133477	0.01305	-0.0240435
851088	VID22	0.0133463	0.0261625	0.00353734
852399	SIF2	0.0133462	-0.00399816	0.00309904
852937	TAM41	0.0133314	-0.0106677	-0.0174409
854676	ASG1	0.0132997	0.012991	-0.0141018
851819	RTN1	0.0132961	-0.0140724	-0.0128604
850740	FCF2	0.0132851	-0.0095044	-0.0168329
854155	CSI2	0.01327	-0.0221366	0.00733751
850527	LPD1	0.0132517	0.012894	-0.00536396
853366	PRY1	0.0132507	-0.00329809	0.00458367
850376	CWH43	0.0132448	0.0113154	-7.48905e-05
853818	ELM1	0.0132265	0.00770283	-0.00727596
853461	APL1	0.0132211	-0.0130927	0.000845861
853971	ESL2	0.0132158	0.0070008	0.0194099
856482	KSP1	0.0131917	0.0120525	0.0170185
850450	ABP1	0.0131833	0.00784065	0.010264
855602	TOM70	0.0131776	0.0122426	-0.0200404
852051	APT2	0.013169	0.00512307	-0.00548518
854023	RRP40	0.0131621	-0.0173095	-0.0162928
853777	MDH1	0.0131582	-0.00420768	-0.0208101
855487	None	0.0131519	0.00979289	-0.00690082
851789	MSS4	0.0131501	0.0159881	0.0164208
853612	HMS2	0.0131477	0.00909431	0.00263209
853765	CWP2	0.0131309	-0.00351145	-0.0171581
851911	OMS1	0.0131294	-0.00696629	-0.0245957
852194	CDC27	0.0131215	0.0031397	0.0243615
851158	CAR2	0.0131214	0.000749527	-0.00338129
856723	NUG1	0.0131034	0.00961716	0.0170111
855629	None	0.0130994	-0.0133963	0.0154664
853195	CWC22	0.0130931	0.0177969	-0.0222131
855988	BEM3	0.0130887	0.00210085	0.0191489
853499	NUP85	0.0130788	0.000118677	-1.51877e-05
851440	CYK3	0.0130373	0.0229663	0.00706231
856419	MAS2	0.0130321	0.0145927	-0.00662048
855339	JNM1	0.013014	-0.0086083	-0.0116612
850613	RPN12	0.0130068	-0.0230551	-0.0129761
853550	EMC2	0.0130013	-0.0173072	-0.0153884
853098	TFG1	0.0129878	0.0266928	-0.00203123
856577	SPC97	0.0129757	-0.00878688	0.0162803
851985	RGA2	0.0129672	0.0186368	-0.000899034
856852	SLX8	0.0129401	-0.0222268	0.0124262
851452	PHO2	0.0129395	0.0216798	0.000359358
853460	SAG1	0.0129162	-0.0130567	0.0136867
856751	SMB1	0.0128934	-0.0135205	-0.0208474
856176	None	0.0128499	-0.02154	0.00346159
851064	ORM2	0.0128433	0.00133235	0.000153423
851456	POL3	0.0128396	0.0224423	0.00492182
851318	CWC2	0.0128388	0.0123889	0.00114207
853900	SET3	0.0128367	0.016146	-0.014725
852054	None	0.0128212	0.00678852	-0.00632798
852995	NOP7	0.0128208	-0.000451648	0.00794946
853218	OPT1	0.0128162	0.011515	-0.0153037
855118	UTP15	0.0128137	0.0153984	8.57755e-05
855481	NAR1	0.0127986	-0.00329037	0.00651591
853724	44105	0.012788	0.00156011	-0.0181879
855174	RPS16A	0.0127812	-0.0186694	-0.0184366
854541	VTS1	0.0127799	0.0147755	0.0150258
852837	RIM8	0.0127792	-0.00564389	0.00288598
851070	ATG33	0.0127676	0.000186788	-0.00901729
855686	BOP3	0.0127614	-0.000573903	0.012506
850601	SAP155	0.0127588	0.013246	-0.0159774
852893	NMA2	0.0126717	-0.00245922	-0.00486196
855923	PPQ1	0.012664	0.0123575	-0.00716051
852121	GNP1	0.0126608	0.0123906	-0.000263494
855045	RSF1	0.0126555	-0.013139	0.000529997
856196	GRS2	0.0126543	-0.000274859	0.00411776
856458	GIC1	0.0126411	0.0146306	-0.0031711
853814	ASK1	0.0126366	-0.00396338	0.0129264
854072	ATG19	0.0126127	-0.00173388	-0.0103807
856918	RAD3	0.0126118	0.0157062	-0.012863
851160	MRPL4	0.01261	0.0197374	-0.0144499
853825	VPS24	0.0125844	-0.0144413	-0.00899867
856593	KOG1	0.0125763	0.00798	0.0246901
855943	CDC60	0.0125743	0.0139027	0.00359628
851339	PPH22	0.0125657	0.000793133	-0.000408955
852767	NSA1	0.0125426	-0.00562161	0.018117
855341	None	0.0125222	-0.0178011	-0.0152423
852304	None	0.0125158	-0.0109492	-0.000645241
853896	GCN3	0.0125012	-0.00450567	-0.00419037
854343	YRM1	0.0124987	0.0139922	0.00345078
854645	None	0.0124937	-0.0213766	-0.00775024
853756	SEG2	0.0124757	0.00733064	-0.00165233
853755	AAT1	0.0124752	-0.0112673	-0.00818586
856753	YPT31	0.0124693	-0.020079	-0.0145884
851956	TRP4	0.0124687	-0.00613694	0.0196765
856695	MMS21	0.0124662	0.011413	-0.0156893
856117	HAA1	0.0124536	0.0182213	-0.00560504
856052	LGE1	0.012444	0.0085402	0.00686176
854294	RGA1	0.0124422	0.00232385	0.0222515
852316	YPK3	0.0124399	0.0022102	-0.00815353
851263	NUP60	0.0124376	0.00548424	0.0150131
853908	CAF4	0.0124217	0.0129696	0.0132215
853477	TES1	0.0124173	0.0163127	-0.013703
850493	None	0.0124099	0.00956082	-0.0132162
856035	MUK1	0.0124093	0.0172773	-0.00760056
850649	SOF1	0.0123906	-0.00212453	-0.0127949
855799	None	0.0123895	-0.00751603	0.00962077
855706	SSN8	0.0123807	-0.00480915	-0.00110134
855620	MET4	0.0123677	-0.00388709	0.0223487
850577	ATG18	0.0123598	0.0230369	0.0106159
853311	URA2	0.0123579	0.0170551	0.0159375
853244	CDC6	0.0123437	0.0100129	-0.0146116
855625	RAS2	0.0123117	-0.0213384	-0.00873839
850879	SWI6	0.0123023	0.020685	0.00306834
852102	IZH1	0.012296	-0.00691978	-0.00429091
850955	MCP2	0.0122901	0.0157006	-0.00990544
852522	PDB1	0.0122826	-0.00023252	0.0130212
851522	PRM7	0.0122786	-0.0129383	0.0108007
851509	LHP1	0.0122657	-0.0105497	-0.0125505
853669	TRP3	0.0122614	-0.0125845	0.0195756
852833	TIF4632	0.0122353	0.0233199	0.00222216
851839	BTT1	0.0122276	-0.0029928	-0.0141677
852276	SLA1	0.0122156	-0.00490499	0.00180875
854828	STS1	0.0121984	0.000198986	-0.0124514
852053	SSN2	0.0121921	0.0125334	0.0213645
850958	HAP1	0.0121634	0.00499725	0.0199238
856173	ARO7	0.0121533	-0.0228684	-0.00544721
856488	RPF1	0.0121415	-0.000322805	-0.00793895
854465	SNF2	0.0121082	0.0198779	0.0210234
852970	None	0.012102	0.0145223	-0.0127272
854060	TRM10	0.0121001	-0.00848003	0.00129965
851285	YAT1	0.0120939	0.0165506	-0.0101964
853828	RGT1	0.0120847	0.0166505	0.0134766
854999	SPT5	0.0120655	0.0159001	0.0239285
851110	CST9	0.0120542	0.0167104	0.0118725
850880	TOS4	0.012042	-0.0140528	0.00392766
851712	None	0.0120352	-0.00672899	-0.0113366
852327	ATP3	0.012015	-0.00877784	-0.02416
850891	NCW2	0.0120001	-0.0132892	0.0187711
855843	NSL1	0.011998	-0.0241802	-0.000882838
853751	HAP4	0.0119963	0.000287389	-0.0216694
851572	GAL3	0.0119892	0.012574	-0.0125032
855781	PET494	0.0119861	0.0115774	-0.0118897
855931	COX10	0.0119861	0.00748331	-0.0281574
853743	SBA1	0.0119823	-0.0190182	-0.0229421
854284	RPT5	0.0119787	0.0136242	0.020322
856931	FMP10	0.0119733	0.0110509	-0.028737
855907	DDC1	0.0119693	-0.00698043	0.00153326
856301	BSP1	0.0119553	0.0140516	0.00377157
854102	PSH1	0.0119529	0.0184375	0.0167467
852703	NUP49	0.011943	0.0161133	-0.00710375
852497	TAF5	0.0119394	0.0203839	0.0152974
853077	CLC1	0.0119337	-0.0176481	-0.0125801
853500	POL32	0.0119292	-0.0166545	0.00803744
853642	ACP1	0.0119261	0.00171336	-0.0080058
855132	YKU80	0.0119235	-0.00187741	0.000717197
856241	CTR1	0.011893	-0.00623751	-0.0159121
852854	CGR1	0.0118886	-0.0227608	-0.00910632
855158	ECM16	0.0118811	0.0222719	0.0122132
854538	CIR2	0.0118737	0.0108351	-0.0118525
852694	GTS1	0.0118577	-0.0079734	0.0115652
852171	RTG3	0.0118505	-0.0136624	0.0124168
856790	CEM1	0.0118094	-0.0185799	0.00714091
854956	RSE1	0.0118028	0.0147584	0.0145687
855059	ARG80	0.0117965	-0.00282583	0.00534803
852707	SUA5	0.0117832	-0.00281955	0.0200389
855052	MIH1	0.0117508	0.00260536	-0.00560082
855820	BBP1	0.0117426	-0.0133375	-0.000293646
855514	RIO2	0.0117203	-0.00841797	0.0199217
852825	OLE1	0.0117189	-0.0121631	-0.0227005
854767	AGE2	0.0117092	-0.0192444	-0.0131363
856888	FTR1	0.0117003	-0.0126357	0.00151624
856847	SWI4	0.0116968	-0.0114706	0.00570379
852975	MRP13	0.0116934	0.008601	-0.0314285
852292	DSF2	0.0116634	0.0134142	-0.000415897
851005	YHC1	0.0116616	-0.00341024	-0.0129691
850605	DUG1	0.0116579	0.0114025	0.00713149
854300	VPS17	0.0116489	-0.000638554	0.00769728
852455	AMN1	0.0116425	-0.00435554	-0.00420782
851325	MRPL11	0.011627	-0.00626111	-0.0249974
850685	SDH2	0.0116188	-0.011298	-0.0148471
852110	LCD1	0.0116102	-0.00942668	-0.0137413
855780	AGA1	0.0116069	-0.00624101	0.0177388
854516	None	0.0116062	0.0133811	-0.0177418
854726	CAB2	0.0116005	0.018307	-0.00668703
852729	ARO2	0.0115887	0.0122042	0.00135672
850627	None	0.0115715	0.013066	0.0149994
852949	PEF1	0.01157	-0.00286594	0.0262627
853027	None	0.0115628	0.00927001	-0.0237179
852709	PMR1	0.0115333	0.00960281	-0.0169736
850839	SMD3	0.011525	-0.0128018	-0.0264294
852239	PRE7	0.0115177	0.00137898	-0.0214624
853072	GTR2	0.0114557	0.00218065	-0.00521651
854479	CPA1	0.0114545	-0.0180747	0.0171263
854253	TCB1	0.0114318	0.000305498	-0.0172244
855639	MKT1	0.0114244	-0.0127275	0.00745272
850996	GUF1	0.0114111	0.0160798	-0.0227123
855793	BIO5	0.0114037	-0.00512534	0.0155279
852269	RRN6	0.0113913	0.0220733	-0.0014498
856287	KRE6	0.0113837	-0.0148786	0.0130246
852549	ENP1	0.011378	0.0178539	0.00401358
852496	None	0.0113611	0.0139766	-0.0168089
856023	MOT1	0.0113599	0.023041	0.0147344
855824	YAH1	0.0113244	0.0205601	-0.0212597
852075	SPP41	0.0113193	0.0229481	0.0148909
856438	NCP1	0.0113132	-0.00862714	-0.00398121
853527	CCT5	0.0112954	-0.00559619	-0.0113518
1466460	LSO2	0.0112766	-0.0277425	0.00702988
854200	SHE4	0.0112463	-0.0161355	0.00951832
855013	CDC5	0.0112066	0.00913701	0.0168187
855140	FOL3	0.0112054	-0.00331828	-0.0161824
850624	GRC3	0.0111988	0.0157514	0.00124686
851847	SWM1	0.0111973	0.000231187	0.00636954
852662	YPT32	0.0111898	0.0139523	-0.0194919
852551	ARO4	0.0111877	-0.00945947	0.0127602
852639	HXK2	0.0111865	-0.00630119	0.00800966
856358	RIM101	0.011164	0.00111837	0.016412
852683	IME4	0.0111545	0.0130627	0.0043055
852136	AGE1	0.0111456	-0.0163973	0.0166549
855866	FUM1	0.0110868	0.00197426	0.00720957
855459	POL2	0.0110676	0.012171	0.0208241
855184	NUP53	0.0110646	0.00209589	0.0219592
851247	OAF1	0.0110563	0.00804701	0.0277602
853242	UBP12	0.0110555	0.0237698	0.0135807
855116	NPL6	0.0109994	0.00905536	-0.0198047
854666	AXL2	0.0109962	-0.0114562	0.015879
852523	PCS60	0.0109956	-0.00301982	0.0258651
855754	ATP23	0.0109821	0.00500882	-0.0305009
855239	CLN1	0.0109762	0.00259826	0.00846428
854158	SIN3	0.0109533	0.0157534	0.0276342
853525	NTA1	0.0109518	-0.0216057	0.00736539
851830	PRP28	0.0109509	0.0209178	-0.0141842
851392	ENT1	0.010927	0.00397711	0.00686391
851400	CLB3	0.0109265	0.0204584	-0.0070315
854904	COG8	0.0109109	0.0184651	0.0135922
855061	IOC4	0.0108931	0.0106641	0.00272925
856760	KRE29	0.0108862	-0.0115285	-0.0108267
854040	ZEO1	0.010882	-0.0218444	-0.0159662
854567	None	0.0108644	0.00619162	-0.00883211
853613	BAT2	0.0108624	-0.0133775	-0.00363015
854651	GUT2	0.0108515	0.00456763	-0.00921967
855996	None	0.010844	-0.00616672	-0.0265483
853312	TRK1	0.0108392	0.00751669	-0.00351477
851113	AFG2	0.0108274	0.0207255	0.0105744
854895	DUS1	0.0108202	-0.00293831	0.0091601
850305	PBN1	0.0108173	-0.00992914	-0.0142801
853968	PTR2	0.0108157	0.0119406	-0.0240964
856584	OYE2	0.0108056	-0.0140163	-0.00176273
851733	CPR1	0.0107983	-0.0220664	-0.00632003
856478	IRE1	0.0107883	0.0124786	0.019331
855869	APM1	0.010787	0.00177807	-0.0122426
851627	YOS9	0.0107858	-0.020654	-0.00710692
856485	IPI1	0.0107782	0.00033025	-0.00406335
852117	GMC1	0.0107775	0.0126893	-0.00958811
852695	ATG1	0.0107741	0.0111772	0.0078764
851326	TRM8	0.0107614	-0.00180555	-0.00185926
853752	SLD2	0.0107434	0.00938555	0.0195527
852074	STP1	0.010722	0.00267981	-0.00547037
852989	ASK10	0.0107219	-0.0105177	0.0196378
853815	SFK1	0.0107198	-0.00998578	-0.00294191
851434	SNA4	0.0107091	-0.0215269	-0.00430414
851202	GIP4	0.0107083	0.0196332	0.0074304
853762	UTP11	0.0106953	-0.0214118	-0.00958983
851342	VMA1	0.0106621	0.00222635	0.00762958
853471	TMA22	0.0106611	-0.00876253	-0.0166
852373	SPT7	0.0106496	0.00595924	0.0273627
850435	RSA4	0.0106393	0.0174557	0.00646185
855178	None	0.0106358	0.0197314	-0.00922768
852170	SEA4	0.0105955	0.0227249	0.00708543
850868	APS1	0.0105947	-0.0197667	-0.0206016
851532	ARP2	0.0105866	-0.0161796	-0.00368743
856195	TEF1	0.0105723	-0.0147039	0.0149115
853363	IML2	0.0105543	0.014299	-0.00673082
853543	AIM24	0.0105345	-0.011539	-0.01887
853541	BNA2	0.0105294	-0.0156496	0.01166
852376	UBC4	0.0104741	-0.0163026	-0.0111315
850713	SED5	0.0104541	-0.00193768	0.0139423
850584	ECO1	0.0104477	-0.00752647	-0.0120427
851799	UPC2	0.0104302	0.0167488	-0.0112004
850345	BUD3	0.010418	0.0227523	0.00219461
852032	SIP1	0.0104052	-0.00261026	0.0275207
851661	SLU7	0.0103909	-0.00971463	0.00938576
853648	FAT3	0.0103774	0.00326631	-0.0029528
851058	RPL26A	0.0103751	-0.014626	-0.0191178
853824	SPC42	0.0103503	0.0168851	-0.0165357
851447	RRP42	0.0103291	-0.0118214	-0.00951016
854142	TLG2	0.0103284	-0.00505919	-0.0114865
853899	SAP190	0.0103042	0.0147988	0.0252112
851955	TRR1	0.0102809	-0.0148611	0.022017
855128	None	0.0102802	0.00561938	0.000967111
850672	None	0.0102776	0.000834197	0.00739643
855107	ADH3	0.0102658	-0.0140875	0.0051455
850705	POM34	0.0102573	-0.0151306	-0.0224741
855155	STO1	0.0102552	-0.0106355	-0.00538049
855695	None	0.0102469	-0.00730801	-0.00528887
856788	FCY21	0.0102298	0.00900235	0.00733598
853223	LAA1	0.010221	0.00149681	0.0215939
856021	BRO1	0.0101912	0.0017159	0.0150294
852747	CEG1	0.0101885	0.0157923	-0.00111982
856442	INM1	0.0101719	-0.0233644	0.00997585
851514	NPC2	0.0101714	-0.0199245	0.0041074
853434	MPS3	0.0101681	0.0243235	-0.000716181
850991	NNT1	0.0101673	-0.023649	-0.00103993
852748	RSM23	0.0101345	0.0136016	-0.023248
851319	NHP2	0.0101274	-0.0191969	-0.0221321
851218	NTG1	0.0101113	-0.0131088	-0.000264398
851177	PDP3	0.0101014	-0.00550171	-0.0112146
852866	JAC1	0.0100952	0.0150402	-0.00959204
851776	REF2	0.0100357	-0.00987208	0.00290853
853508	UTR1	0.0100335	0.00665837	-0.00606455
851256	ERV46	0.00999662	-0.00860137	0.00970572
853750	KTI12	0.00999146	-0.0226006	0.0104962
853886	MIC60	0.00998698	-0.0016671	-0.0131322
851337	UFD2	0.00997878	0.00267805	0.00152012
856002	ELP4	0.00996137	0.0047719	0.0162195
856904	BUR6	0.00993875	-0.0236383	0.0106298
852947	RSC1	0.00992918	0.0181853	0.0180089
856582	None	0.00992464	0.00396705	0.0128148
851618	VMS1	0.00991575	0.0130508	-0.00214002
856362	NPR3	0.00989266	0.00934901	0.0159061
852129	GRH1	0.00987829	0.00618034	-0.00183062
853649	MTR2	0.00987647	-0.0274345	-0.00459124
856614	SET5	0.00986849	-0.00193982	-0.0112639
851260	EFB1	0.0098633	-0.0200356	-0.0187098
854259	ECM3	0.00985351	-0.00909374	0.00398585
853616	DAN4	0.00984443	-0.0109002	0.0226779
855529	CHS1	0.00983892	-0.0106004	0.0150118
852971	TWF1	0.00983287	0.00824783	-0.0209281
854221	NOB1	0.00982402	0.0218253	0.00570995
851575	RPL4B	0.00982097	0.022315	-0.0114168
853062	MTR3	0.00982017	-0.00269963	0.00184833
850793	CDC45	0.00981927	0.00935744	0.0154708
856928	SLO1	0.00979499	-0.0252397	0.0067223
852614	HAP2	0.00975405	0.0112082	-0.0191292
851494	PEX19	0.00975123	-0.00876849	-0.00795203
854826	MSL1	0.00974974	-0.0172153	-0.0127574
855648	MKS1	0.00974947	0.0217593	0.0125196
851358	LRG1	0.00974777	-0.0164984	0.0185382
851610	ENA1	0.00974215	-0.00253433	-0.00957254
852798	None	0.00973341	-0.00932866	-0.00472228
852719	RCK1	0.00972987	0.0085399	-0.0065169
851023	SPH1	0.00972965	-0.0196928	0.0204408
855399	PFS2	0.00972373	0.00881312	0.0162985
854009	HXT11	0.00971809	0.00196082	0.00152311
855152	None	0.00971641	-0.0181549	0.00450877
852897	MSB2	0.00971418	0.00090146	0.0172642
853170	COQ6	0.00971262	0.0202864	-0.0129572
856279	TPO3	0.00969768	-0.00256929	0.00751147
852640	RTG2	0.00969299	-0.0216525	0.0205919
856533	ECM14	0.00968662	-0.0186046	-0.0102707
856382	STE20	0.00965226	0.0143568	0.0167845
851705	ARO1	0.00964616	0.0187348	0.0143851
851667	DNF2	0.00961648	0.00172094	0.0229477
856324	OPT2	0.00960826	-0.012455	0.010197
852309	FUR4	0.00959746	0.020972	-0.00373019
850785	KIN2	0.00959216	0.0217107	0.0173
856763	GLN3	0.00956218	-0.00162176	0.0247884
856305	DPB2	0.00955439	0.0160508	0.00907074
850589	SMC2	0.00954452	0.0148937	0.0162278
850714	AAT2	0.00954196	-0.015298	0.021
853567	URA8	0.00954062	0.00875478	0.000701772
851159	LSM3	0.00952991	-0.0166785	-0.0154334
854916	PHO84	0.00952474	0.00847335	-0.0143385
850349	STP22	0.00952436	0.0179617	0.0158291
852218	SKT5	0.00952297	0.0122814	0.0069135
852008	HPT1	0.00949947	-0.0030293	-0.0153192
851141	DCK1	0.00949695	0.0189843	0.0168681
853929	RHO4	0.00949334	-0.010715	-0.00280556
856618	FLO5	0.00948896	0.00428006	-0.00164813
851924	UTP4	0.00948206	0.012315	0.0185477
855946	TGS1	0.00947981	-0.0108275	0.0118645
850683	FPS1	0.00943419	0.0165222	-0.0111719
851000	GSP1	0.00943151	-0.00207123	-0.0162816
850835	DPH6	0.00941777	0.0185908	0.00649638
855730	RLP7	0.0094128	-0.00902307	2.80289e-05
854431	CDC31	0.0094103	0.000521622	-0.0187603
853465	TDH2	0.00940059	0.00754825	-0.0131249
854820	DJP1	0.00940051	-0.00823497	-0.0133657
855261	FMP42	0.00939766	-0.0264149	0.0107097
856877	None	0.00939372	-0.021331	0.00209532
853593	EFM3	0.0093805	-0.00147447	-0.0217324
851529	SLM3	0.00937618	0.0215495	-0.0134238
852768	CUE3	0.00934102	0.0159569	-0.00406789
852235	COR1	0.00934069	-0.0040469	-0.00545065
855176	NDE1	0.00932806	0.00952133	-0.011032
854296	AFI1	0.00930858	-0.0153383	0.0257456
851066	None	0.00930621	0.0219192	0.0110778
852972	SLX9	0.00930221	-0.00466529	-0.0287341
851859	HEL2	0.00929528	0.0106011	0.0169443
851504	PSA1	0.00929309	-0.0161647	-0.0167839
856183	MED1	0.00929176	-0.00690493	0.00435963
856502	KIC1	0.00928848	0.0167274	0.0189529
852087	None	0.00928738	0.00912734	-0.00278344
852724	PEX14	0.00927469	-0.0136937	-0.00566957
852987	RRP46	0.00927247	-0.00405715	-0.00107966
854977	NDC1	0.00926806	0.0092262	-0.00740503
854801	MNT3	0.00926545	-0.0227418	0.00196799
851363	YPD1	0.00926092	0.00343021	-0.0307221
853410	NUP192	0.0092581	0.0163007	0.0163522
854437	DSE3	0.00925595	0.0177216	-0.0148921
854384	NPT1	0.00924638	-0.0155054	0.0167415
852271	SCT1	0.00924485	0.0151321	-0.0154475
853262	RPL17B	0.00919494	-0.0212556	-0.0189063
854088	RIB2	0.0091914	0.000390769	0.0287964
851148	CRN1	0.0091803	0.0027985	0.00997353
856892	PEA2	0.00917003	-0.0225969	0.0163678
856848	LSM4	0.00916694	-0.0167241	-0.0216651
850593	QCR6	0.00916343	0.000878666	-0.0185315
854318	MDM32	0.00916234	-0.0117723	-0.0159922
854408	KIN4	0.00915654	0.0129815	0.0240286
852088	SNF1	0.00914503	0.0177002	-0.0110023
852923	None	0.00913404	-0.00137167	-0.00596245
853735	SSH4	0.00913286	-0.00339996	-0.0130935
855559	None	0.00912107	-0.0221477	-0.00432963
855758	MPP6	0.00911845	-0.00411732	-0.0110671
852101	PKH1	0.00910891	0.0179796	-0.00035956
854565	FIT3	0.00910109	-0.00293873	0.0109818
851812	ADK1	0.00910047	-0.0259926	-0.00407253
851734	RPA14	0.00909856	-0.00208649	-0.0207261
850748	REX2	0.0090853	0.0120174	-0.00949009
854954	GAL80	0.00907577	-0.0138034	0.0238291
851192	CYC3	0.00906325	0.0123578	0.0062334
854275	LEU9	0.00905956	-0.00907345	0.0205522
854769	PKP1	0.00904376	0.0205036	-0.0068073
856455	MED6	0.00904109	-0.021436	0.00835857
856698	GTT3	0.0090315	0.0154698	-0.0235464
854353	LAS17	0.00902547	0.0225239	0.00158097
851303	HBT1	0.0090164	-0.013528	0.00948384
856610	RPS4B	0.00901459	-0.0230841	-0.00821171
854216	ETT1	0.00900377	-0.0182019	-0.000627263
853734	RRN3	0.00900325	-0.00115474	0.0105384
854279	CEX1	0.00900138	0.0270225	-0.00687707
850829	NHA1	0.0089845	0.0180823	0.00578486
855224	HSC82	0.00898134	-0.00596116	0.00662807
856863	NSA2	0.00896596	0.00340368	-0.00647653
852568	TSC10	0.00896322	0.0239255	-0.00277948
855144	SPC24	0.00895506	-0.00802498	-0.00989413
855394	KRE1	0.00891959	-0.00889338	-0.0115544
853427	RNR2	0.00891823	-0.00799021	0.00240636
853667	DOA1	0.00890962	-0.00318614	0.0232294
853153	KEL2	0.00889556	0.00583043	0.00856014
855804	DSE4	0.00889211	0.00418199	0.0127901
851580	KCS1	0.00888843	0.0234623	0.0113802
851844	RKM4	0.00888549	0.00593629	-0.000158444
855386	RPD3	0.00888186	-0.00824036	0.00190282
854836	FLO11	0.00888031	-0.00200841	-0.000506963
854697	SEC24	0.00886417	0.0167699	0.0180175
854093	PRS5	0.00884917	0.0121821	0.00720993
856112	AIM45	0.00883085	0.00532473	-0.00998885
855315	SCS7	0.00882856	-0.0203542	-0.00848157
850549	SPB4	0.00882294	0.00425112	0.00798936
855994	GDE1	0.00882004	0.0196198	-0.00507552
850721	SMF3	0.00880761	-0.011726	-0.00123932
853364	ARP4	0.00878026	0.00481525	0.021356
856236	CLB2	0.00876602	-0.00843113	-0.0256784
852746	SNT2	0.00876454	0.0215894	0.0020639
855253	CEF1	0.00876303	0.0284272	0.00175425
855023	HXT2	0.00875123	0.00505847	-0.0184773
851736	HOM2	0.00875035	-0.0200417	-7.69767e-05
854505	SNC2	0.00874987	-0.0278511	-0.00741252
856736	BIM1	0.00874782	-0.0235256	0.000623447
855244	INP1	0.00872138	-0.00582968	0.00461479
853955	MTD1	0.00871075	-0.00397319	-0.0199554
855161	RRB1	0.00871011	-0.00998841	0.0182145
854715	RSM25	0.00870615	0.00683558	-0.0278448
856867	COM2	0.00869549	-0.0207203	0.00272415
852372	SEC18	0.00867842	0.019585	0.0163564
853941	GPT2	0.00864518	0.00274931	-0.0200451
853775	CYT2	0.00863435	-0.00200958	-0.0210193
855803	None	0.00861659	-0.00838876	-0.0209238
853560	JJJ3	0.00861249	0.00364306	-0.0139635
850436	SSK22	0.00856731	-0.00437434	0.0261717
855831	None	0.0085646	-0.0171651	0.0183793
854673	RPL16A	0.00855334	-0.0100955	-0.0267503
853737	SRP21	0.00853872	-0.0210877	-0.0243151
853891	ALY1	0.00852568	0.011114	0.018476
856830	PUP3	0.0085236	-0.0208204	-0.0172668
853531	RFC2	0.00849412	-0.0244633	-0.00974038
855624	OCA1	0.00849175	-0.0274736	0.000559346
853598	SGM1	0.00849054	-0.00573192	0.00248373
855020	PLB1	0.00848778	0.00856596	-0.00309202
851614	HEM13	0.0084621	0.00676362	-0.0240918
851073	ADE13	0.00843699	-0.0077453	-0.00103022
851992	ATO3	0.00842984	-0.00141558	-0.0168792
854037	MSB4	0.00842539	0.0139125	-0.00988499
853526	RPA12	0.00842241	-0.00744757	-0.0255646
854038	MDY2	0.0084178	0.0107036	-0.0162966
852361	TAT1	0.00840947	0.0156977	-0.0177532
853958	DAD2	0.00837876	-0.0118574	-0.0263984
853080	PSD2	0.00836815	0.00840546	0.021793
852790	LIF1	0.00836678	-0.00890502	0.00238461
851151	ATG23	0.0083442	0.0140175	-0.0313227
854453	RFM1	0.00833098	-0.0176683	-0.000126209
856144	SRO7	0.00832959	0.0248049	0.00519461
852317	CDS1	0.00832186	-0.000413723	-0.0143518
856204	YPR090W	0.00831248	0.0247092	0.00506354
855669	POR1	0.00830101	0.0128	-0.0058136
850837	RMP1	0.00829751	-0.00654468	-0.0282897
854839	MRS1	0.00829138	0.0107442	-0.0255876
855768	ABZ1	0.00825137	0.0220963	0.00615331
851495	UBC9	0.00824738	-0.0018421	-0.0101018
851597	MRH1	0.00820788	0.00542829	-0.0273496
852348	MUM2	0.00819924	-0.0164157	-0.0112657
853182	None	0.00818957	0.0200277	-0.00128298
852377	TEC1	0.00816432	-0.0115464	0.00862073
850597	CDC26	0.00815738	0.00957286	-0.0160732
856039	RGL1	0.0081271	-0.00717255	0.0216674
852311	CHS3	0.00812064	-0.00746554	0.0302071
852211	PRS4	0.00810102	-0.000577205	0.00228071
855882	PCL8	0.00809556	0.0147016	-0.0186229
853498	URB2	0.00806056	0.0146398	0.0163271
854324	PDR5	0.00805697	-0.010897	0.0280108
851587	SES1	0.0080403	-0.0226107	0.00350881
852550	HIS7	0.00803439	-0.0157897	0.0288824
851244	PEX22	0.00802473	0.000901886	-0.00707745
855779	MVD1	0.00801686	-0.0128753	0.0231918
856462	RRP3	0.00801595	0.011544	0.00161943
853994	MDH2	0.00800656	0.0117806	-0.008698
850945	MAP1	0.00799697	0.0255136	0.00117734
851330	ASF2	0.0079764	-0.011712	0.023967
852424	VMA2	0.00797179	0.000956505	0.0132325
850766	FMP25	0.007965	0.0113653	-0.0166601
856463	SSF1	0.00795252	0.00942205	0.00974315
854034	PAP2	0.00794322	0.0168228	0.00831351
2746858	NBL1	0.0079357	-0.0232577	0.0128805
856804	ALD5	0.00793153	-0.0180118	0.00817986
853906	DID2	0.007928	-0.0256226	-0.00522272
855949	PEP4	0.00792181	-0.000728321	-0.0156273
850741	IES3	0.00791755	-0.0202847	-0.0166549
851131	INA1	0.00791399	0.00876265	-0.00710992
856260	MEP3	0.0079035	-0.00092024	-0.00339185
850405	BUD5	0.00790148	0.00183656	0.00992121
853729	MYO3	0.00789687	0.0153966	0.0129526
852976	RPL11B	0.00788712	-0.021376	-0.0213524
855981	TFB2	0.00788343	-0.0226778	-0.00182782
850318	GID7	0.00787456	0.00698113	0.0129987
854938	TEM1	0.00785883	-0.00281085	-0.014968
855618	INP52	0.00785365	-0.00183385	0.0192724
851170	FPR4	0.00785252	0.0118411	0.0174631
855295	None	0.00781218	0.00386555	-0.0164428
851379	AIR2	0.00780208	0.0224441	-0.00864012
856418	MYO1	0.00779217	0.0195817	-0.00524588
856290	SGV1	0.007776	0.0179814	0.024231
851273	KIN3	0.00774621	-0.0121785	0.0163099
853227	PRP21	0.00774267	-0.0199115	-0.00502351
853307	LCB3	0.00773761	-0.000387159	-0.0238168
850930	CDC42	0.00771548	-0.0257	-0.00725979
855154	EPO1	0.00770381	0.0244861	-0.0127695
854812	EPS1	0.00769655	0.00141181	-0.0117033
853683	NNK1	0.0076932	-0.00597462	0.0193931
852732	TIP20	0.00768694	-0.0267059	0.00925252
851100	IKI3	0.00768485	0.0220674	0.0212124
852563	RGD1	0.00766889	0.0200552	0.00280702
854677	TAO3	0.0076552	0.017674	0.0238884
854165	UTP23	0.00765457	-0.00760094	-0.00647498
853439	MAD3	0.00765428	-0.0244502	-0.00425463
851781	VPS64	0.00764795	-0.00383609	0.0258444
855201	PAH1	0.00764637	0.0145654	0.00804748
855318	BUL1	0.00763338	0.0185771	0.0114187
854765	MET30	0.00761896	0.0199628	0.00784492
852865	CKB1	0.00761377	-0.00448821	0.0202553
851634	LCB2	0.00760975	-0.0245041	-0.00704165
850351	LDB16	0.00759687	-0.00570068	-0.0264443
851813	SIR4	0.0075934	-0.0199721	0.0217384
850745	ERG3	0.00758346	-0.026097	0.00527521
851315	None	0.00754234	0.0184197	-0.0106076
856079	ERG10	0.00753455	-0.0187489	0.0145433
853175	TNA1	0.00752816	-0.00964428	-0.00111026
851525	PUS9	0.00748687	-0.00993787	0.00627116
856697	PMP2	0.00748663	-0.0177337	-0.000978228
851055	FKS1	0.00748272	0.0112946	0.0231937
854852	LYS1	0.00746997	-0.0166946	0.0158832
854503	FRT1	0.00744253	0.0207804	-0.013166
854320	SMP3	0.00742483	-0.0227453	0.00623571
851425	LYS21	0.00741084	-0.0221733	0.0180898
852655	KIP3	0.0074039	0.0142882	0.0117181
853919	None	0.00739851	0.0183058	-0.0160758
855886	CBP3	0.00739689	0.00336523	-0.0294548
854560	AMF1	0.00738953	-0.010217	0.0175238
850496	EMP47	0.00736571	-0.0245528	-0.0196299
854303	IDH2	0.00736286	-0.00601278	-0.00261776
851520	SIR2	0.00735418	0.0080592	0.0183052
856427	ERC1	0.00735225	0.0133987	0.0163083
855833	SRP68	0.00734616	0.00240019	0.0101735
853320	ALB1	0.00734588	-0.0205497	0.00350204
856272	NCE102	0.00733907	-0.0143586	-0.0208674
854770	GVP36	0.0073316	-0.000912219	-0.0178216
855986	IDI1	0.00733028	-0.00918876	-0.0122567
850730	AFB1	0.00732746	0.000986413	-0.00806487
851013	ACO1	0.00730941	0.00289118	-0.00435161
852159	None	0.00730856	-0.0197829	0.0179259
856725	TMA20	0.00730801	-0.0221969	-0.00100509
851770	SLY1	0.00730606	0.0208933	0.0178116
851329	GGC1	0.00727991	-0.00237274	-0.00815407
856335	None	0.00724968	-0.00226392	0.0164297
854562	RDR1	0.00724676	0.0151476	-0.00936325
853909	SPC34	0.00724183	0.0181478	-0.00812269
856024	RPS9A	0.00723945	-0.0238008	0.00375252
856203	SRP54	0.00723814	-0.00877	-0.00018113
851641	DOA4	0.00723103	0.0240194	0.00633283
850343	NFS1	0.00722799	0.00499866	0.00936217
853877	RSC4	0.00722771	0.0211852	0.0100892
856361	RIM4	0.00721905	0.00646726	-0.00353868
854564	FIT2	0.00721762	-0.00470624	0.00795503
854804	TIR3	0.00721681	-0.0194027	0.0147196
853546	CSN12	0.0072036	0.00640685	0.0050203
853977	FLO10	0.00720321	0.0162109	-0.00801153
854797	BAR1	0.00720179	0.0094997	-0.00436814
856400	TDA3	0.0071988	0.00424365	-1.0034e-05
851862	CCC2	0.00719727	0.0135557	0.00802017
853596	NMD5	0.00719462	0.0160097	0.0192875
851475	SUB2	0.00718575	-0.0181986	-0.00332221
854483	MCH5	0.0071769	-0.00470105	0.019989
856823	PTC2	0.00715529	0.0261001	0.00316108
854342	LCB4	0.00714786	-0.0197316	0.019207
854197	HMS1	0.00714136	-0.0111451	0.00157191
850901	QRI5	0.00713837	-0.0108371	-0.0256633
852423	TPS1	0.00713317	0.0173017	-0.0175114
853605	HIR3	0.00712635	0.0173691	0.0231695
852437	IRA1	0.00710872	0.0247527	0.0150311
855090	AVO2	0.00710806	0.00297932	0.0112584
855420	MON2	0.00710323	0.0110331	0.0114152
855269	RRP5	0.00708058	0.0213065	0.016825
852060	UTP6	0.0070704	7.57749e-06	-0.0209016
851477	RPL13A	0.0070554	-0.0125346	-0.0118108
854973	AMD1	0.00705499	0.000618912	0.0152076
856081	SKS1	0.00705391	0.0162361	-0.0239591
855680	SLM2	0.00705217	0.011781	0.00820971
855607	DMA2	0.00704672	-0.000301003	0.0136536
856569	DNA2	0.00703845	0.0266259	0.000504813
850887	MMR1	0.00703825	-0.00687196	-0.0160033
855415	RPL18B	0.00702731	-0.00354408	0.00166942
850812	YPS3	0.00701198	-0.0125611	0.0112029
855806	BSC5	0.00697082	-0.0137874	0.00383841
852480	SMP1	0.00695484	-0.00444544	0.00279159
855288	FAA4	0.00693981	0.00865275	0.00446093
853200	None	0.00693855	-0.0047161	-0.0088329
855651	MSK1	0.00693529	0.00558437	-0.0146845
854933	POB3	0.00692147	0.00159529	0.0115657
851087	ELO3	0.00691429	-0.0225258	-0.006979
850580	LSB3	0.00690444	-0.00371592	0.0145177
851173	SST2	0.00688422	-0.00297569	0.00579442
853142	DIE2	0.00687396	0.0146367	0.00267881
856004	ATG21	0.00684311	0.0135254	-0.0155721
850623	PRP19	0.00684249	0.0223166	0.0102819
850938	THI7	0.00683231	-0.0154193	-0.00232492
850400	ELO2	0.00681706	-0.0258443	-0.00602407
855255	GAS3	0.0068011	0.00505147	-0.0158991
856566	YAP1801	0.00677011	-0.00132506	0.011399
854326	ISN1	0.00676869	-0.00971562	-0.00962597
851014	STT4	0.0067573	0.0144359	0.0260233
853287	VPS35	0.00674368	0.0197494	0.015874
855598	ESBP6	0.00673987	0.013152	0.0098246
854466	YPK9	0.00673511	0.0101735	-0.016266
854177	None	0.00672086	0.00257196	-0.014141
852805	MPS2	0.00671507	0.00992771	-0.0197127
856431	BRL1	0.00670737	0.0149468	-0.0170759
851296	None	0.00667116	0.00302492	-0.00265416
851805	MFB1	0.00664308	-0.0162374	-0.00342118
851197	MTW1	0.00664182	-0.0067573	-0.0127843
850590	RPL2A	0.0066301	-0.0222822	-0.015125
853023	PPT1	0.00662055	-0.00202384	0.0152065
856793	VHR2	0.00661551	0.0198314	-0.00643786
850902	HMX1	0.00660243	-0.00370328	0.0048714
852574	EFM2	0.00659379	-0.0154285	0.0162567
851591	VPS54	0.00658278	0.0260792	-0.00293179
855899	AFT2	0.00657288	-0.0250299	0.0217196
855217	SPT21	0.00657099	0.0109814	0.00824377
851589	RPS11A	0.00655888	-0.0160337	-0.0210152
853149	YHB1	0.006549	-0.0121969	0.0148382
852940	SCM4	0.00653073	-0.00953306	0.000604489
856611	MNL1	0.00651283	0.0125551	0.000924639
856275	URN1	0.00650614	0.0256366	0.00183414
853093	TIM13	0.00648385	-0.0167771	-0.0182455
852525	TDP1	0.00646733	0.0125347	-0.0139362
852664	SIP2	0.00646232	0.00250002	-0.00183736
856835	UBP9	0.00644083	-0.0163992	0.00330427
856903	None	0.00643769	0.0165456	-0.00716099
855043	TAP42	0.00643577	-0.000871832	-0.00935952
852526	None	0.00643324	0.0128301	0.00718648
853679	ZRT3	0.00640151	-0.000805749	0.00627685
855941	None	0.00639115	-0.0202341	-0.0119283
852080	SDC1	0.00638655	-0.0112215	-0.0246766
856145	HTS1	0.00638032	-0.0176793	0.0149195
856092	HST2	0.00635722	-0.0101717	0.0162174
856784	RPL34A	0.00635693	-0.0173524	-0.0232379
854781	SSM4	0.00634836	0.0129392	0.0181599
855863	DIP5	0.00634787	-0.00460697	-0.0166988
852412	LYS2	0.00630839	-0.0187731	0.0260093
850873	RFX1	0.00629902	0.0247622	0.00429636
851430	PCL2	0.00628165	-0.0249213	0.0159784
850860	MAS1	0.00627786	0.0168316	-0.0025119
853940	CCP1	0.00626807	0.0108045	-0.0164306
852119	GIN4	0.00625869	0.00446139	0.0234297
855663	GCD10	0.00625485	0.00339282	0.0123355
854061	YPQ1	0.00624069	-0.0259227	-0.00351434
853975	SKG1	0.00623839	-0.0271816	-0.0130581
855641	SAL1	0.00623234	0.00922942	-0.0238223
856411	ARG4	0.00622771	-0.0130756	0.0131023
853128	RPS0A	0.00622602	-0.0193173	-0.0165229
854096	ARG1	0.00621932	0.0110303	-0.018043
851613	NRG1	0.00621666	0.00557883	-0.0166917
852988	TPC1	0.0062059	0.0211729	-0.00774043
854746	EFM4	0.00618412	-0.00511163	-0.00401449
854763	NEO1	0.00618272	-0.0146634	-0.00536586
852173	ECM21	0.00617648	0.0246834	-0.00161141
854183	ROD1	0.00617603	-0.00389329	0.0173935
854173	TIR4	0.00616804	-0.00136756	0.00890649
855352	SCW10	0.00615486	-0.0159477	0.0135128
851333	SNF3	0.00613855	0.018018	-0.0135976
856460	PAN5	0.00613396	-0.0149229	0.0156909
855920	CTI6	0.00613084	-0.0220632	0.0162802
855110	SEG1	0.00612984	0.00362179	0.0235075
853230	ACO2	0.00611614	-0.0225514	0.0179075
850939	FAR10	0.00611346	0.0107448	-0.0218768
854689	PRM5	0.00610264	-0.00493808	0.0130947
853512	RAD7	0.0060924	0.00388384	0.0186097
850808	CLF1	0.00608466	0.0170303	0.0141898
854274	RGS2	0.00605461	-0.00263417	-0.0137692
855765	SSK2	0.00604552	0.0101751	0.0279053
855353	FKS3	0.00603406	0.0257235	-0.00678468
854900	HMG1	0.00602447	0.00570197	0.0169856
854929	BUL2	0.00602432	-0.0138614	0.0246218
851289	FLO1	0.00602394	0.00675859	-0.00331834
852287	RER2	0.00601257	-0.013777	0.00088091
853060	PTI1	0.00601081	0.0236295	-0.00992107
852290	RCR1	0.00600693	-0.00750384	-0.0105036
854010	HPF1	0.00600065	0.00500734	-0.00377314
852073	MRPL28	0.00599732	0.0179464	-0.0257354
852754	RPS2	0.00599143	-0.015639	-0.0122432
853701	RSM22	0.00598275	0.0219818	-0.0187013
852506	FTH1	0.00598267	0.00297981	-0.0120212
854941	PIF1	0.00598172	0.0172439	-0.0192211
853031	None	0.0059649	0.00840268	0.0169101
850360	YCP4	0.00594838	-0.000580735	-0.0282151
850570	None	0.0059307	-0.0124889	0.0307301
852198	PET112	0.00592005	0.0222466	-0.0256777
854233	ALG8	0.00589041	-0.0139704	-0.0111632
850412	RRT12	0.00588871	0.0169523	0.00502652
851542	RPN4	0.00587681	0.00602119	-0.000274705
855913	POS5	0.00587524	-0.0226966	0.0146168
853164	MGA1	0.00586887	0.0159119	-0.0131603
853969	RPL40B	0.00584936	-0.0247145	-0.017728
853388	BIT61	0.00584383	0.023381	-0.00475996
855548	MDG1	0.0058361	-0.0187238	0.0104292
854742	SEC6	0.00583328	0.0237261	-0.00842108
854511	MRS2	0.00582813	0.0171073	-0.0261354
855509	VID27	0.00582157	-0.00888021	0.0232285
855101	VPS20	0.00581195	-0.0193632	-0.016119
851018	IMH1	0.00581162	0.0162774	0.0131188
850366	SAT4	0.00580529	-0.000936802	0.0075098
854741	RPS24B	0.00580299	-0.017861	-0.0165593
851838	PAM1	0.0057995	0.00440646	0.00332833
853131	CCH1	0.00579519	0.0203805	0.0127607
856512	None	0.00578926	-0.0185605	0.0178859
854974	SRC1	0.00578434	0.0176019	-0.0120099
851299	PHO11	0.00577363	0.00688753	-0.0116168
855576	None	0.00577113	-0.00986016	-0.00104181
853168	PUP2	0.00576571	-0.0257386	-0.0143231
856825	MET6	0.00576359	-0.00490043	0.00866576
856276	43975	0.00575036	0.0226524	-0.0138032
854204	CKB2	0.00574653	-0.0257197	-0.00716917
855667	None	0.00572677	0.0123498	-0.0036527
855092	MOT3	0.00571063	0.0195442	0.0124443
855678	SFB2	0.00570811	-0.00240499	0.0196216
853881	None	0.00569204	-0.000296455	-0.013986
850819	DCN1	0.00568593	0.00832084	0.00814104
854513	ALA1	0.00568101	-0.00316383	0.021514
855458	YIF1	0.00568013	-0.0191681	-0.0165337
856913	DNF1	0.00567067	0.0264872	0.00512163
853661	COS9	0.00566581	-0.0174939	0.0200991
850401	RRP43	0.00565719	-0.0202288	-0.00117405
852872	ERG4	0.00564512	-0.0162458	-0.0105208
854117	RPS15	0.0056327	-0.0182682	-0.0204723
856155	PUF2	0.00562481	0.00538539	-0.00181386
856887	UBP5	0.00562314	0.00271756	0.0303429
853917	SHB17	0.00560634	-0.0141472	0.00743253
852238	FUI1	0.00560037	0.0111595	-0.00918275
850688	NOC3	0.00559676	0.0206497	0.0091884
856433	RRF1	0.00557762	0.00507949	-0.0335444
853419	HCA4	0.00553252	0.0121534	0.0233273
853326	NCA3	0.00552331	-0.0119754	0.00613006
853009	SHY1	0.00551519	0.00335506	-0.0123186
853570	ECM27	0.00551336	0.00460435	0.0139104
851691	PDS1	0.00550296	0.00445459	0.0118652
853192	RTT102	0.00549228	0.011812	-0.0230179
851308	None	0.00548508	0.0176126	0.00329369
855427	PCL1	0.00548493	-0.0207857	0.0107662
855029	ERG5	0.00547584	-0.0124871	-0.00821637
850630	FRA1	0.0054715	0.00104848	0.0297588
853965	PXL1	0.00546564	0.0215843	-0.000924006
852810	RPB9	0.00544136	-0.0270903	-0.00968514
853518	None	0.00542511	-0.0155091	0.0119304
855829	None	0.00541962	0.012072	0.00268001
854572	FEX1	0.00540485	-0.014106	-0.00474762
856227	DBF20	0.00540429	-0.0104393	0.00700219
854167	TSR3	0.00540197	-0.0182344	-0.00227259
850470	RDS1	0.00536945	0.00602451	-0.00242002
851172	LEU3	0.00536358	0.013339	0.0229701
854544	PRE10	0.00536169	-0.0167893	0.00527132
854718	ICE2	0.00535302	0.0152692	-0.00384672
855705	SAM50	0.00535092	0.017448	0.00303624
855844	SSO1	0.00532162	-0.0113525	0.0137748
852699	None	0.00531209	0.0131511	0.00444548
853885	None	0.0053095	-0.00184972	0.0207836
852006	NCB2	0.00530628	-0.0235668	-0.0154537
856267	NOC4	0.00527578	-0.00564143	0.0258998
850979	PIG1	0.00526526	-0.0115208	0.0175882
856729	TIR1	0.00525831	0.0103718	-0.00926183
856691	GEA2	0.00524232	0.0232484	0.0133573
853746	APN1	0.00523381	-0.0178571	0.0043088
856028	None	0.00521771	-0.0246132	-0.00568624
853152	None	0.00520748	-0.0201728	0.0168812
855584	SRV2	0.00520547	0.0216284	-0.00134034
850523	GAT1	0.0052	0.0226035	-0.00136314
853310	AIM23	0.00518946	-0.00712318	-0.0264987
855471	RAD50	0.00518943	0.00919079	0.0131819
850656	ORC3	0.00517881	0.0168577	-0.00869224
855281	CUS1	0.00516599	0.0022739	0.000154309
852597	SUL1	0.00515074	0.0164547	0.00185154
853323	None	0.005112	-0.00376114	0.0110062
850491	DAK2	0.00509726	0.0226395	-0.0139972
853934	UTP30	0.00506863	0.00389719	-0.0136799
853918	UIP5	0.00502316	-0.0137625	0.0260133
852478	DTR1	0.00502119	-0.0071967	0.0141505
851010	MET17	0.0050086	-0.0141848	0.0159799
855728	HRB1	0.00497049	0.024538	0.0121038
852199	NUP170	0.00495716	0.0281374	0.0106939
851845	HSP78	0.00493513	0.00469293	-0.00705876
853592	RSF2	0.00492958	0.0128378	0.0118478
854495	FAA1	0.00492662	0.0102131	-0.00103998
855080	FET3	0.00492533	-0.00238976	0.0015515
853399	UBX6	0.00492349	-0.0161688	0.00474206
852772	MLC1	0.00492056	-0.0287175	-0.00392751
853748	ABF1	0.00492039	0.0149181	0.0198355
852931	KSS1	0.00490985	-0.00181587	0.0085056
854046	WSC3	0.00490661	-0.00992683	0.0322048
853992	YGK3	0.00490389	-0.00432261	-0.0137413
851608	ENA5	0.00490207	0.00833991	-0.00692513
851472	None	0.00490207	0.0102916	-0.0170618
851356	None	0.00489058	-0.0146594	0.0104076
852765	SLD3	0.00488994	0.013179	0.00897042
855138	None	0.00488783	-0.0232688	0.0060868
851810	HTB1	0.00485704	-0.0151733	-0.0141972
850515	CAK1	0.00485173	-0.0240322	0.011839
851551	GRX6	0.00484428	-0.020242	-0.00922738
854679	RRT14	0.00483419	-0.0114434	-0.0141425
852382	IST2	0.00482526	0.00998192	-0.0216244
856449	CIC1	0.00481763	-0.000705246	-0.00470224
855332	HSH155	0.00481047	0.02715	0.00197648
856118	SUT2	0.0047903	-0.0162861	-0.00723237
855836	HSP82	0.00478711	0.0148889	-0.00530455
851468	RAM1	0.00477971	0.0243729	-0.0138502
[truncated: 3,377 more rows]

## Sheet: PCA-Loading_NormalizedMetabol
	PC1	PC2	PC3
Phenylalanine (166.0 / 120.0)	-0.146984	0.00130861	0.0689132
Epinephrine (166.0 / 77.0)	-0.144942	0.0281734	0.0608264
GMP (364.1 / 152.0)	-0.140175	0.0655824	-0.0540967
DTMP (321.1 / 79.0)	-0.140033	0.00820687	-0.0651966
UMP (325.0 / 97.0)	-0.138017	0.0519473	-0.0159199
Leucine /D-norleucine (132.0 / 86.0)	-0.134588	-0.0530537	0.0754956
Valine (118.0 / 72.0)	-0.133669	0.0297658	0.0542554
AMP (346.1 / 79.0)	-0.133176	-0.0163391	-0.0706941
CMP (322.0 / 97.0)	-0.124154	0.00126783	-0.0575546
n-glycylproline (173.0 / 116.0)	-0.123705	0.0323962	-0.0294619
Mevalonate (147.0 / 59.0)	-0.122462	0.0817311	0.013619
Uracil (111.0 / 42.0)	-0.119037	-0.0507455	0.12453
Asparagine (133.0 / 74.0)	-0.117421	-0.0116253	-0.0245388
2-aminoisobutyric acid (104.0 / 87.0)	-0.113334	0.122331	-0.0222515
Glycine (76.0 / 30.1)	-0.111037	0.0276187	0.0239123
gamma-Aminobutyrate (102.0 / 84.0)	-0.11096	0.0866674	-0.0419253
1-Methyladenosine (282.1 / 150.1)	-0.109294	-0.129354	0.018538
iso-Leucine /allo-isoleucine (132.0 / 86.0 (2))	-0.107837	0.0731694	0.122519
Quinolinic Acid (166.0 / 122.0)	-0.106661	0.00153138	0.00535571
N-Ac-Glutamate (188.0 / 128.2)	-0.104336	-0.0924105	-0.140888
Lysine (147.0 / 84.0 (2))	-0.104108	-0.0482462	-0.0298324
Xanthosine (283.1 / 151.0)	-0.101093	-0.0541813	0.0847647
Guanosine (284.2 / 152.1)	-0.100793	-0.0943531	0.0691399
NAD (664.0 / 428.0)	-0.100223	0.0502209	-0.0196297
N-Ac-Arginine (217.0 / 158.0)	-0.0964333	0.00964659	-0.150981
Tyrosine (182.1 / 136.0)	-0.0940779	-0.10731	0.0434326
Methionine (150.0 / 61.0)	-0.0934404	0.0665548	-0.049019
ethanolamine (62.0 / 44.0)	-0.0930681	0.0765592	-0.012781
Thiamine (265.0 / 122.0)	-0.0912232	-0.0244286	-0.116
Choline (104.0 / 60.0)	-0.0844898	-0.128946	-0.0812915
Oxidized glutathione (611.2 / 306.0)	-0.0831572	0.0355071	0.040045
Histidine (156.0 / 110.0)	-0.0820765	0.107954	0.0511799
SAH (385.0 / 136.0)	-0.0819138	0.11667	0.0055887
Orotate (155.0 / 111.0)	-0.07777	0.119683	-0.0770999
S-methylcysteine (136.0 / 119.0)	-0.0771883	-0.0816407	0.0865002
Adenosine (268.2 / 136.1)	-0.0769033	-0.0533317	-0.038744
pseudouridine (243.0 / 153.0)	-0.0757481	-0.149262	-0.0380283
Alanine (90.0 / 44.0)	-0.0745039	0.14169	0.0740473
Guanine (152.0 / 135.0)	-0.0733985	-0.0291235	0.138232
Citrulline (174.0 / 131.0)	-0.0701078	0.0968509	0.0383472
Pyroglutamic Acid (130.0 / 83.9)	-0.0696291	0.113308	-0.0530923
methionine sulfoxide (166.0 / 74.0)	-0.0661608	0.12223	0.01756
homocitrulline (190.0 / 173.0)	-0.0645193	0.0263111	0.0206186
Arginine (175.0 / 70.0)	-0.063106	-0.106739	-0.0075608
L-Kynurenine (209.1 / 94.0)	-0.061786	0.0538952	0.0323986
threonic acid (135.0 / 75.0)	-0.058872	0.121242	0.0792386
Uridine (245.2 / 113.1)	-0.0528564	-0.102487	0.150107
Inositol (179.0 / 87.0)	-0.051805	-0.0775053	-0.104523
Reduced glutathione (306.3 / 143.1)	-0.0487374	0.0162335	0.148304
Niacinamide (123.0 / 80.0)	-0.047953	0.044818	0.0404863
N6-Trimethyllysine (189.0 / 84.0)	-0.0437265	-0.0791145	-0.0621327
N-Ac-Phenylalanine (206.0 / 164.0)	-0.043347	0.0350812	0.0220852
Proline (116.0 / 70.0)	-0.0417496	0.0729031	-0.0717121
N-Ac-Alanine (130.0 / 88.0)	-0.0411374	0.144465	-0.00410214
FAD (786.0 / 348.0)	-0.0403556	0.0375	-0.0167662
Cytosine (112.0 / 95.0)	-0.0401315	0.0422306	0.0393452
Serine (106.0 / 60.0)	-0.0388037	0.126347	0.0138547
NADP (743.0 / 620.7)	-0.0362598	0.127894	-0.107656
Nicotinic Acid (122.0 / 78.0)	-0.0358922	-0.0683867	0.0307368
3-(4-hydroxyphenyl)propionate (165.0 / 121.0)	-0.0332599	-0.0532341	0.0506901
N-Acetylputrescine (131.0 / 114.0)	-0.0328621	-0.0102999	0.0119577
Glutamine (147.0 / 84.0)	-0.0323152	-0.00962045	-0.0946931
homoarginine (189.0 / 144.0)	-0.0306258	-0.0484996	-0.0257251
xylonate (165.0 / 75.0)	-0.0301699	0.0142841	-0.0326834
Aspartic Acid (134.0 / 74.0)	-0.0274927	0.049655	0.0923125
Pentothenate (218.1 / 88.0)	-0.026862	0.048833	-0.0931071
Aminolevulinate (132.0 / 86.2 (2))	-0.0257073	0.0917248	-0.015534
trigonelline (138.0 / 94.0)	-0.0252198	0.10489	-0.00480238
Cytidine (244.2 / 112.1)	-0.0231407	-0.108123	0.17021
dimethylarginine (A/SDMA) (203.0 / 70.0)	-0.0210081	-0.111402	-0.0725849
cGMP (344.0 / 150.0)	-0.0201722	-0.0960144	0.113681
3/4-hydroxyphenylacetic acid (151.0 / 106.9)	-0.0198345	-0.0789753	0.010817
L-mandelic acid (151.0 / 107.1)	-0.0196348	-0.0664986	0.0373287
Se-methylselenocysteine (184.0 / 167.0)	-0.0188022	-0.11114	0.0157594
Glutamic acid (148.0 / 84.0)	-0.0187724	-0.0706162	0.108197
arabitol/xylitol (151.0 / 89.0)	-0.0185003	-0.107153	-0.120174
erythronic acid (135.0 / 75.0 (2))	-0.0169885	0.162172	0.0882052
2-hydroxyphenylacetate (151.0 / 107.0)	-0.016611	-0.0106155	0.0188929
Glycerophosphocholine (258.0 / 104.0)	-0.0161065	0.0462925	-0.135205
Histamine (112.0 / 95.0 (2))	-0.0151739	0.0761307	0.00651764
Urate (167.0 / 124.0)	-0.0141553	0.00044291	0.0554285
S-adenosylmethionine (SAM) (399.0 / 250.0)	-0.0137794	-0.14813	-0.116346
N2,N2-Dimethylguanosine (312.2 / 180.1)	-0.0127086	-0.109311	-0.0154889
3-methyl-3-hydroxyglutaric acid (161.0 / 99.0)	-0.0123175	0.0288106	0.0659142
N6-Acetyl-lysine (189.0 / 126.0)	-0.00912026	-0.157125	-0.0586912
Palmitic Acid (255.0 / 237.0)	-0.00768637	0.000577838	-0.125654
Pyridoxal-5-P (246.0 / 96.9)	-0.0021278	0.0371216	-0.00603878
Succinate (117.0 / 73.0)	-0.000915225	0.0135109	0.0811046
Acetylcarnitine (204.1 / 85.0)	-0.000896353	-0.0614659	-0.192079
N-AcetylGlycine (116.0 / 74.0)	-0.000391692	-0.0304848	0.00297147
xylose (149.0 / 75.0)	0.0030901	-0.0190978	-0.00141857
Xanthine (151.0 / 108.0)	0.0036793	-0.119899	0.180843
Sorbitol (181.0 / 89.0)	0.00402369	-0.150208	-0.0758836
5'-methylthioadenosine (298.0 / 136.0)	0.00427521	-0.141152	-0.115058
Carnitine (162.0 / 85.0)	0.0043711	0.105022	0.0754552
DL DOPA (198.0 / 152.0)	0.00584816	0.141521	0.0412292
Ornithine (132.9 / 70.0)	0.00934361	-0.159477	-0.0895491
2/3-Phosphoglyceric Acid (185.0 / 79.0)	0.0103822	0.0289505	0.102855
ADP (426.0 / 134.0)	0.0118019	-0.100183	0.0106748
Pipecolate (130.0 / 84.0)	0.0118506	-0.124334	-0.126134
Adenine (134.0 / 107.0)	0.0119738	-0.135317	-0.117379
1-methylnicotinamide (137.0 / 94.0)	0.0130734	0.00843869	-0.0966401
mannitol (181.0 / 119.0)	0.0148104	-0.130963	-0.0315864
5-methylcytidine (258.0 / 126.0)	0.0158625	-0.122439	0.0632568
Suberic acid (173.0 / 111.0)	0.019516	-0.0428234	0.0571969
1/3-Methylhistidine (170.0 / 96.0)	0.0218776	-0.0251651	0.0392955
Threonine (120.0 / 74.0)	0.0224347	0.0362604	-0.0348138
DCMP (306.0 / 110.0)	0.0225916	0.0166409	0.115118
UDP (403.0 / 79.0)	0.0253541	-0.0698209	0.0889259
Cholesteryl sulfate (465.0 / 97.0)	0.0260337	-0.000525132	0.0161748
Azelaic Acid (187.0 / 125.0)	0.0275832	-0.040073	0.0486166
Geranyl Pyrophosphate (313.1 / 79.1)	0.027917	-0.0321403	0.0235189
Glucose (179.0 / 89.0)	0.0300406	-0.0131062	-0.0312971
Maleic Acid (115.0 / 71.0 (2))	0.0302091	-0.0366648	-0.0477932
Deoxycarnitine (147.0 / 87.0)	0.0338485	0.0794266	-0.0683018
7-methylguanine (166.0 / 149.0)	0.0351509	-0.0691342	0.11589
Sedoheptulose 7-phosphate (289.0 / 97.0)	0.0391291	0.0610681	-0.0642279
5-methyluridine (257.0 / 42.0)	0.0391794	-0.0960331	0.0204321
Thiamine pyrophosphate (425.0 / 122.0)	0.0406398	-0.0420409	-0.00462077
2-oxo-isocaproic acid (129.0 / 85.1)	0.0413121	-0.0655822	0.0309706
Taurocyamine (168.0 / 126.0)	0.0419681	-0.11602	-0.0247022
Inosine (269.2 / 137.1)	0.0453558	-0.0994552	0.139882
Glycerate (105.0 / 75.0)	0.0466194	-0.112138	-0.0168682
Hypoxanthine (135.0 / 92.0)	0.0468401	-0.0888219	0.118
Tryptophan (205.1 / 146.0)	0.0532751	-0.0430062	0.0555577
3-hydroxypropionic acid (89.0 / 59.1)	0.0534547	0.129379	0.0933165
n-formylmethionine (176.0 / 47.0)	0.0545722	0.0694031	0.04827
Cystathionine (221.1 / 134.0)	0.0591875	-0.00811188	-0.0807897
Alpha-Ketoglutaric Acid (145.0 / 101.0 (2))	0.0610561	0.0333329	-0.130963
TTP (481.0 / 159.0)	0.0622023	0.00473753	0.0274118
Erythrose-4-phosphate (199.0 / 97.0)	0.0630096	0.102914	-0.0933165
Creatinine (114.0 / 44.0)	0.0635783	-0.0156699	-0.151207
PPA (163.0 / 91.0)	0.0637368	-0.0697395	-0.0189348
alpha-ketophenylacetic acid (149.0 / 77.0)	0.071815	0.0159659	-0.0265285
Betaine Aldehyde (102.0 / 58.0)	0.0763037	0.0438371	-0.0400686
Betaine (118.0 / 58.0)	0.0776652	0.128548	0.0561122
NADH (666.0 / 649.0)	0.0778768	0.0331655	-0.111923
D-Leucic Acid (131.0 / 85.0)	0.0822237	-0.0764568	0.160039
phenylacetic acid (135.0 / 91.0)	0.0876043	-0.0478016	0.0378929
Adenylosuccinate (462.1 / 79.0)	0.0898172	0.0885714	0.113341
GTP (522.0 / 159.0)	0.0898523	0.0138994	0.0827407
Malate (133.0 / 115.0)	0.0923933	0.117478	0.0996661
3HBA (103.0 / 59.0)	0.092912	-0.0633986	0.129509
NADPH (746.0 / 729.0)	0.0973125	0.0368184	-0.0935826
PRPP (389.0 / 177.0)	0.101025	0.042539	-0.0678827
2-Hydroxyglutarate (147.0 / 129.0)	0.101997	-0.0169315	-0.0510779
DHAP (169.0 / 79.0)	0.1084	0.0943998	-0.106806
D-GA3P (169.0 / 97.0)	0.11048	0.0923983	-0.102784
2-hydroxyisobutyrate (103.0 / 57.1)	0.111469	-0.0163236	-0.0515384
isovalerylcarnitine (246.0 / 85.0)	0.111892	0.0667603	-0.00281153
CTP (482.0 / 159.0)	0.11551	-0.0133112	0.092369
IMP (347.1 / 79.0)	0.118573	-0.0157417	0.0195321
ATP (505.9 / 79.0)	0.122455	-0.0243585	0.102591
2-hydroxybutyrate (103.0 / 57.0)	0.122849	0.0160658	0.0903872
Argininosuccinate (291.0 / 70.0)	0.125286	0.0495106	-0.0151706
5-Aminovaleric Acid (118.0 / 101.0)	0.125494	0.0328114	-0.0111175
Pyruvate (87.0 / 43.0)	0.127015	-0.0125169	0.00802718
Lactose/Trehalose (341.0 / 59.0)	0.128165	0.0172999	-0.00857272
G1P/G6P/F6P/F1P (259.0 / 97.0)	0.12968	0.0308263	-0.0958389
phenyllactic acid (165.0 / 147.0)	0.131653	0.0145405	0.114106
lactate (89.0 / 43.0)	0.132045	0.0261663	0.0104706
Phosphoadenosine phosphosulfate (506.0 / 426.0)	0.132227	-0.00992595	0.0994226
F16BP/F26BP/G16BP (339.0 / 79.0)	0.133895	0.0595525	-0.0844531
Ribose-5-P (229.0 / 79.0)	0.136342	0.03568	-0.0632452
Ribulose 5-phosphate (229.0 / 97.0)	0.137344	0.0494671	-0.0882328
UDP-Glucose (565.0 / 323.0)	0.146201	-0.0230172	0.0325702
